1 **Crystal structure of GH43 exo- $\beta$ -1,3-galactanase from the basidiomycete *Phanerochaete***  
2 ***chrysosporium* provides insights into the mechanism of bypassing side chains**

3

4 Kaori Matsuyama<sup>1</sup>, Naomi Kishine<sup>2</sup>, Zui Fujimoto<sup>2</sup>, Naoki Sunagawa<sup>1</sup>, Toshihisa Kotake<sup>3</sup>,  
5 Yoichi Tsumuraya<sup>3</sup>, Masahiro Samejima<sup>1,4</sup>, Kiyohiko Igarashi<sup>1,5\*</sup>, and Satoshi Kaneko<sup>6\*</sup>

6

7 1 Department of Biomaterial Sciences, Graduate School of Agricultural and Life Sciences,  
8 The University of Tokyo, 1-1-1 Yayoi, Bunkyo-ku, Tokyo 113-8657, Japan

9 2 Advanced Analysis Center, National Agriculture and Food Research Organization (NARO),  
10 2-1-2 Kannondai, Tsukuba, Ibaraki 305-8518, Japan

11 3 Department of Biochemistry and Molecular Biology, Faculty of Science, Saitama University,  
12 255 Shimo-Okubo, Sakura-ku, Saitama 338-8570, Japan

13 4 Faculty of Engineering, Shinshu University, 4-17-1, Wakasato, Nagano 380-8533, Japan

14 5 VTT Technical Research Centre of Finland, PO Box 1000, Tietotie 2, Espoo FI-02044 VTT,  
15 Finland

16 6 Department of Subtropical Bioscience and Biotechnology, Faculty of Agriculture,  
17 University of the Ryukyus, 1 Senbaru, Nishihara, Okinawa, 903-0213, Japan

18

19 \* Corresponding author

20 KI: [aquarius@mail.ecc.u-tokyo.ac.jp](mailto:aquarius@mail.ecc.u-tokyo.ac.jp)

21 SK: sakanekeo@agr.u-ryukyu.ac.jp

22

23 Abbreviations (in order of appearance)

24 AGPs, arabinogalactan proteins; Gal, D-galactose; *Pc*1,3Gal43A, exo- $\beta$ -1,3-galactanase from

25 *Phanerochaete chrysosporium*; GH, glycoside hydrolase; GH43\_sub24, GH family 43

26 subfamily 24; CBM, carbohydrate binding module; *Ct*1,3Gal43A, exo- $\beta$ -1,3-galactanase from

27 *Clostridium thermocellum*; BT3683,  $\beta$ -1,3-galactosidase from *Bacteroides thetaiotaomicron*

28 VPI-5482; *Pc*Cel45A, endoglucanase V from *P. chrysosporium*; SeMet, selenomethionine;

29 Gal3,  $\beta$ -1,3-galactotriose; WT, wild-type; WT\_Gal, WT bound with Gal; E208Q\_Gal3,

30 E208Q bound with Gal3; E208A\_Gal3, E208A bound with Gal3; *Pc*CBM35, CBM35 domain

31 of *Pc*1,3Gal43A; Gal<sub>-1</sub>, Gal residue occupied subsite -1; Gal<sub>+1</sub>, Gal residue occupied subsite

32 +1; Gal<sub>+2</sub>, Gal residue occupied subsite +2; Gal2,  $\beta$ -1,3-galactobiose; Gal\_site 1, the

33 non-reducing terminal Gal residue of Gal3 bound to *Pc*CBM35; Gal\_site 2, the middle Gal

34 residue of Gal3 bound to *Pc*CBM35; Gal\_site 3, the reducing terminal Gal residue of Gal3

35 bound to *Pc*CBM35; HPLC, high-performance liquid chromatography; *Pc*Lam55A,

36 exo- $\beta$ -1,3-glucanase from *P. chrysosporium*; *Sacte*Lam55A, GH55 exo- $\beta$ -1,3-glucanase from

37 *Streptomyces* sp.; *Hj*Cel3A, GH3  $\beta$ -1,3-glucosidase from *Hypocrea jecorina*; Cte\_2137,

38 CBM35 of *C. thermocellum* cellulosomal protein; PEG, polyethylene glycol

39

40 **Abstract (less than 250) (247)**

41

42 Arabinogalactan proteins (AGPs) are functional plant proteoglycans, but their functions are

43 largely unexplored, mainly because of the complexity of the sugar moieties, which are

44 generally analyzed with the aid of glycoside hydrolases. In this study, we solved the apo and

45 liganded structures of exo- $\beta$ -1,3-galactanase from the basidiomycete *Phanerochaete*

46 *chrysosporium* (*Pc*1,3Gal43A), which specifically cleaves AGPs. It is composed of a

47 glycoside hydrolase family 43 subfamily 24 (GH43\_sub24) catalytic domain together with a

48 carbohydrate-binding module family (CBM) 35 binding domain. GH43\_sub24 lacks the

49 catalytic base Asp that is conserved among other GH43 subfamilies. Crystal structure and

50 kinetic analyses indicated that the tautomerized imidic acid function of Gln263 serves instead

51 as the catalytic base residue. *Pc*1,3Gal43A has three subsites that continue from the bottom of

52 the catalytic pocket to the solvent. Subsite -1 contains a space that can accommodate the C-6

53 methylol of Gal, enabling the enzyme to bypass the  $\beta$ -1,6-linked galactan side chains of AGPs.

54 Furthermore, the galactan-binding domain in CBM35 has a different ligand interaction

55 mechanism from other sugar-binding CBM35s. Some of the residues involved in ligand

56 recognition differ from those of galactomannan-binding CBM35, including substitution of Trp

57 for Gly, which affects pyranose stacking, and substitution of Asn for Asp in the lower part of

58 the binding pocket. *Pc*1,3Gal43A WT and its mutants at residues involved in substrate

59 recognition are expected to be useful tools for structural analysis of AGPs. Our findings  
60 should also be helpful in engineering designer enzymes for efficient utilization of various  
61 types of biomass.  
62

63 **Running title**

64 Crystal structure of fungal GH43 galactanase

65

66 **Keywords (five from list + include less than 5)**

67 glycoside hydrolase family 43, carbohydrate binding module family 35 exo- $\beta$ -1,3-galactanase,

68 arabinogalactan-protein, *Phanerochaete chrysosporium*

69

## 70 **Introduction**

71 Arabinogalactan proteins (AGPs) are proteoglycans characteristically localized in the plasma  
72 membrane, cell wall, and intercellular layer of higher land plants (1), in which they play  
73 functional roles in growth and development (2). The carbohydrate moiety of AGPs is  
74 composed of a  $\beta$ -1,3-D-galactan main chain and  $\beta$ -1,6-D-galactan side chain, decorated with  
75 arabinose, fucose, and glucuronic acid residues (1, 2). The chain lengths and frequencies of  
76 side chains are different among plant species, organs, and stages of development (3), and the  
77 overall structures of the carbohydrate moieties of AGPs are not yet fully understood.  
78 Degradation of polysaccharides using specific enzymes is one approach to investigate their  
79 structures and roles. In this context, exo- $\beta$ -1,3-galactanase (EC 3. 2. 1. 145) specifically  
80 cleaves the non-reducing end  $\beta$ -1,3-linked galactosyl linkage of  $\beta$ -1,3-galactans to release  
81 D-galactose (Gal). In particular, it releases  $\beta$ -1,6-galactooligosaccharides together with Gal  
82 from AGPs (4, 5), and is therefore useful for structural analysis of AGPs.

83 The basidiomycete *Phanerochaete chrysosporium* produces an exo- $\beta$ -1,3-galactanase  
84 (*Pc*1,3Gal43A; GeneBank accession No. BAD98241) that degrades the carbohydrates of  
85 AGPs when grown with  $\beta$ -1,3-galactan as a carbon source (6). *Pc*1,3Gal43A consists of a  
86 glycoside hydrolase (GH) family 43 subfamily 24 (GH43\_sub24) catalytic domain and a  
87 carbohydrate-binding module (CBM) belonging to family 35 (designated as *Pc*CBM6 in the  
88 previous paper) based on the amino acid sequences in the Carbohydrate-Active enZymes

89 (CAZy) database (<http://www.cazy.org>; 6-8). The properties of the enzyme have been  
90 analyzed using recombinant *Pc1,3Gal43A* expressed in the methylotrophic yeast *Pichia*  
91 *pastoris* (6). The CBM35 of *Pc1,3Gal43A* was characterized as the first  $\beta$ -1,3-galactan  
92 binding module, and *Pc1,3Gal43A* showed typical GH43\_sub24 activity. The enzyme cleaves  
93 only  $\beta$ -1,3-linkages of oligosaccharides and polysaccharides, but produces  
94  $\beta$ -1,6-galactooligosaccharides together with Gal. Thus, *Pc1,3Gal43A* specifically recognizes  
95  $\beta$ -1,3-linked Gal, but can accommodate  $\beta$ -1,6-bound side chains (6).

96 Glycoside hydrolases are classified into families based on sequence similarity, while  
97 they are also divided into major two groups according to their catalytic mechanisms, i.e.,  
98 inverting enzymes and retaining enzymes (9, 10). Inverting enzymes typically utilize two  
99 acidic residues that act as an acid and a base, respectively, and a hydroxyl group connected to  
100 anomeric carbon inverts from the glycosidic linkage after the reaction. GH43 enzymes are  
101 members of the inverting group, and share conserved Glu and Asp as the catalytic acid and  
102 base, respectively (8), but GH43\_sub24 enzymes lack the catalytic base Asp (8, 11, 12). In  
103 *Ct1,3Gal43A* (from *Clostridium thermocellum*), Glu112 was thought to be the catalytic base  
104 (13), but in BT3683 (from *Bacteroides thetaiotamicron*), Glu367 (corresponding to Glu112 of  
105 *Ct1,3Gal43A*) was found not to act as a base, but to be involved in recognition of the C-4  
106 hydroxyl group of the non-reducing terminal Gal, and instead, Gln577 is predicted to be the  
107 catalytic base in the form of an unusual tautomerized imidic acid (12). An example of GH

108 lacking a catalytic base, endoglucanase V from *P. chrysosporium* (*PcCel45A*), is already  
109 known, and based on the mechanism proposed for this enzyme, it is possible that  
110 tautomerized Gln functions as a base in GH43\_sub24, or that this Gln stabilizes nucleophilic  
111 water. *PcCel45A* lacks the catalytic base Asp that is conserved in other GH45 subfamilies  
112 (14), but it uses the tautomerized imidic acid of Asn as the base, as indicated by neutron  
113 crystallography (15). However, it is difficult to understand the situation in GH43\_sub24, since  
114 no holo structure with a ligand at the catalytic center has yet been solved in this family.  
115 Moreover, no structure of eukaryotic GH43\_sub24 has yet been reported.

116           The CBM35 module is composed of approximately 140 amino acids. This family  
117 includes modules with various binding characteristics, and decorated with xylans, mannans,  
118  $\beta$ -1,3-galactans, and glucans (16–21). The family members are divided into four clusters  
119 based on their sequences and binding specificities (17). The structures of CBM35s binding  
120 with xylan, mannan, and glucan have already been solved (16–21), but no structure of  
121  $\beta$ -1,3-galactan-binding CBM35 has yet been reported.

122           In the present manuscript, we solved the apo and liganded structures of *Pc1,3Gal43A*.  
123 Based on the results, we discuss the catalytic mechanism and the mode of ligand binding to  
124 CBM35 in the two-domain structure.

125



126 **Results**

127 *Overall structure of Pc1,3Gal43A*

128 The crystal structure of the selenomethionine (SeMet) derivative of *Pc1,3Gal43A* was first  
129 determined by means of the multiwavelength anomalous dispersion method, and this was  
130 followed by structure determination of the ligand-free wild-type (WT), the WT bound with  
131 Gal (WT\_Gal), the E208Q mutant co-crystallized with  $\beta$ -1,3-galactotriose (Gal3;  
132 E208Q\_Gal3), and the E208A mutant co-crystallized with Gal3 (E208A\_Gal3). Data  
133 collection statistics and structural refinement statistics are summarized in Tables 1 and 2,  
134 respectively.

135 The recombinant *Pc1,3Gal43A* molecule is composed of a single polypeptide chain  
136 of 428 amino acids (Gln21-Tyr448) with two extra amino acids, Glu19 and Phe20, derived  
137 from the restriction enzyme cleavage site, which are disordered and thus were not observed.  
138 The protein is decorated with *N*-glycans, since it was expressed in *Pichia* yeast. Up to three  
139 sugar chains are attached at Asn79, Asn194, and Asn389; the attached chains vary in position  
140 and structure, and most contain one or two *N*-acetylglucosamine moieties.

141 *Pc1,3Gal43A* is composed of two domains, and ligands introduced by soaking or  
142 co-crystallization are located in a subsite of the catalytic domain or the binding site of  
143 CBM35 (Fig. 1). The N-terminal catalytic domain consists of a five-bladed  $\beta$ -propeller  
144 (Gln21-Gly325), as in other GH clan-F enzymes, and the C-terminal domain (*Pc*CBM35)

145 takes a  $\beta$ -jellyroll fold (Thr326-Tyr448) structure, as in previously reported CBM35s (16–25).  
146 *Pc*CBM35 contains one calcium ion near the end of the first  $\beta$ -strand on a different domain  
147 surface from the plane to which the ligand binds (Fig. 1). The structure of *Pc*CBM35 is  
148 similar to those of other known CBM35s. The interface area is 686 Å<sup>2</sup> and includes many  
149 water molecules. The PDBePISA server  
150 ([http://www.ebi.ac.uk/msd-srv/prot\\_int/cgi-bin/piserver](http://www.ebi.ac.uk/msd-srv/prot_int/cgi-bin/piserver)) indicates that the enzyme forms a  
151 complex in the crystal, but this is an effect of crystallization, and the enzyme exists as a  
152 monomer in solution (data not shown).

153

#### 154 *Sugar-binding structure of the Pc1,3Gal43A catalytic domain*

155 The five-bladed  $\beta$ -propeller exhibits an almost spherical structure, and two central cavities are  
156 located at the ends of the pseudo-5-fold axis (Fig. 1). One of them contains the catalytic site  
157 and it is common in almost all GH43 enzymes. The catalytic site is located in the center of the  
158 five-bladed  $\beta$ -propeller, whose blades are formed by Gln21 or Asn22-Leu87 (I in Fig. 1),  
159 Ser88-Asp155 (II in Fig. 1), Ser156-Gly204 (III in Fig. 1), Ala205-Ser247 (IV in Fig. 1), and  
160 Ala248-Asp297 (V in Fig. 1).

161 As shown in Fig. 2, the Gal3 molecule co-crystallized with the E208Q mutant occupies  
162 subsites -1, +1, and +2 of the catalytic site, from the non-reducing end to the reducing end.  
163 Gal<sub>-1</sub> is located at the bottom of the catalytic cavity, and Gal<sub>+1</sub> and Gal<sub>+2</sub> extend linearly

164 outwards. Gal<sub>+1</sub> is half buried in the cavity, whereas Gal<sub>+2</sub> is exposed at the surface (Fig. 2A).

165 Gal<sub>-1</sub> adopts a <sup>1</sup>S<sub>3</sub> skew boat conformation and interacts with many residues via hydrogen  
166 bonds and hydrophobic interactions. As shown in Fig. 2B and C, the C-2 hydroxyl group of  
167 Gal<sub>-1</sub> forms hydrogen bonds with NH<sub>2</sub> of Arg103 and with OE1 of Gln263 via water. In  
168 addition, this water molecule is bound with O of Gly228. The C-3 hydroxyl group of Gal<sub>-1</sub>  
169 also forms a hydrogen bond with OE2 of Glu57 via water. Glu102, Tyr126, Asp158, Gln208,  
170 Thr226, Trp229, and Gln263 interact with Gal<sub>3</sub> through hydrophobic interactions. Notably,  
171 Trp229 supports the flat C3-C4-C5-C6 structure of Gal<sub>-1</sub>, and Tyr126 recognizes the C-6  
172 methylol and C-4 hydroxyl groups, while Glu102 recognizes the C-3 hydroxyl and C-4  
173 hydroxyl groups. In Gal<sub>+1</sub> (as shown in Fig. 2B and C), the C-2 hydroxyl group forms a  
174 hydrogen bond with NE2 of Gln208 and N of Gly228, while O5 forms a hydrogen bond with  
175 ND2 of Asn180, and C-6 hydroxyl group forms a hydrogen bond with OD1 of Asn179 via  
176 water. Tyr126, Arg157, Asn180, and Gln208 interact hydrophobically with Gal. In Gal<sub>+2</sub> (Fig.  
177 2B and C), the C-2 and C-4 hydroxyl groups form hydrogen bonds with OG1 of Thr226 and  
178 ND2 of Asn180, respectively. In addition, Thr226 interacts with Gal<sub>+2</sub> through hydrophobic  
179 interaction. Furthermore, the glycosidic oxygen between Gal<sub>+1</sub> and Gal<sub>+2</sub> interacts with ND2  
180 of Asn180 through a hydrogen bond.

181 In the structure of WT\_Gal, one Gal was found at subsite -1, taking a <sup>4</sup>C<sub>1</sub> chair  
182 conformation with  $\alpha$ -anomeric conformation of the C-1 hydroxyl group (data not shown). The

183 binding mode of Gal<sub>1</sub> is almost the same as that in E208Q\_Gal3, but the C-1 hydroxyl group  
184 in the axial position forms hydrogen bonds with Gly228 and Gln263. No Gal3 molecule was  
185 observed at the catalytic domain in the structure of the Gal3 co-crystallized E208A mutant.

186 In order to identify the catalytic residues, we examined the relative activity of WT  
187 and the six mutants towards  $\beta$ -1,3-galactobiose (Gal2) and Gal3. WT showed  $5.58 \pm 0.35$  and  
188  $11.15 \pm 0.39$  units of activity ( $\mu\text{mol Gal} / \text{min/nmol enzyme}$ ) towards Gal2 and Gal3,  
189 respectively, whereas the six mutants showed no detectable activity (Fig. S1), suggesting that  
190 these residues are all essential for the catalysis.

191

#### 192 *Sugar-binding structure of CBM35 in Pc1,3Gal43A*

193 *Pc1,3Gal43A* has one CBM35 domain at the C-terminus. We previously reported that this  
194 enzyme has a CBM6-like domain (6), but it has been reclassified into the CBM35 family (7).  
195 The  $\beta$ -jellyroll fold domain is accompanied by a single calcium ion binding site on a different  
196 domain surface than the surface to which the ligand at the end of the first  $\beta$  chain binds, and  
197 this corresponds to a conserved calcium ion binding site in CBM35s. Some CBM35 modules  
198 bind another calcium ion at a site at the top of domain (16), but *PcCBM35* lacks this second  
199 calcium ion binding site (Fig. 1).

200 In E208A\_Gal3, electron density of Gal3 was observed in the ligand binding site of  
201 *PcCBM35*. As illustrated in Fig. 3A and S2, 2Fo-Fc omit maps showed that the binding mode

202 of *Pc*CBM35 with ligands is “exo-type”, corresponding to type-C CBM (26). The asymmetric  
203 unit of E208A\_Gal3 contained four *Pc*1,3Gal43A molecules and each molecule binds to the  
204 non-reducing end of Gal3 (called Gal\_site 1), as in other CBM35 modules. However, the  
205 middle Gal (Gal\_site 2) and the reducing end Gal (Gal\_site 3) are found in two main locations  
206 (Fig. 3), though residues involved in the interactions with the ligand in each molecule were  
207 mostly shared. The Gal\_site 1 forms hydrogen bonds with Tyr355 and Arg388 and interacts  
208 hydrophobically with Leu342, Gly354, Tyr438, and Asp441. The Gal\_site 2 interacts  
209 hydrophobically with Gly383 and Asp384. The main ligand interaction in the Gal\_site 3  
210 involves Gly409 and Gly410, but in addition to these residues, Asn411 is also involved in  
211 ligand recognition in chain C (Fig. 4).

212

### 213 *Ensemble refinement*

214 In order to understand the fluctuation of ligands, ensemble refinements were performed with  
215 the refined models. This method produces ensemble models by employing the combination of  
216 X-ray structure refinement and molecular dynamics. These models can simultaneously  
217 account for anisotropic and anharmonic distributions (27). Four different pTLS values (%) of  
218 0.6, 0.8, 0.9, and 1.0 were set for each model. Table 3 shows the statistical scores of the  
219 refinement with the most appropriate pTLS value for each model. Focused views of the  
220 catalytic site in the catalytic domain and the ligand binding site of the CBM are shown in Fig.

221 5 and 6, respectively. Note that structures containing multiple molecules in the asymmetric  
222 unit (WT and E208A\_Gal3) are found for all molecules in this paper.

223 In the catalytic site, the vibration levels of some residues were significantly different  
224 between the apo and holo forms. As shown in Fig. 5, Tyr126, Arg157, Asp158, Asn179,  
225 Asn180, Gln181, Trp229, and Gln263 in the liganded structures (Fig. 5B, C, F, G, J, and K)  
226 showed smaller vibrations than in the apo structures (Fig. 5A, D, E, H, I, and L). These results  
227 indicate that side chain fluctuations converge upon ligand binding. Comparison of the  
228 Gal-bond structure (i. e. WT\_Gal; Fig. 5B, F, J) with the Gal3-bond structure (i. e.  
229 E208Q\_Gal3; Fig. 5 C, G, K) showed that the fluctuations of Glu(Gln)208, Asn179, and  
230 Thr226 of E208Q\_Gal3 were smaller than these in WT\_Gal. Therefore, it can be inferred that  
231 these residues recognize the ligands at the plus subsites. The catalytic acid, Glu208, has two  
232 major conformations in WT and WT\_Gal. These two conformations were also reported in the  
233 BT3683 structure (12). Thus, the movement of this residue appears to be important for  
234 catalysis. Gln263 shows one conformation (Fig. 5A-D) that is identical to the result of the  
235 ensemble refinement of Asn92, known as imidic acid in *PcCel45A* (Fig. S3). Glu102 may  
236 distinguish non-reducing terminal Gal, since it interacts with the axial C-4 hydroxyl group of  
237 Gal<sub>-1</sub> (12). The vibration degree of Glu102 was different between WTs and mutants, so its  
238 conformation does not depend on the ligand localization, but reflects interaction with Glu208,  
239 which serves as a general acid. Asp158 of WT and E208A\_Gal3 show greater vibration than

240 WT\_Gal and E208Q\_Gal3. The role of Asp158 is thought to be a pKa modulator, therefore its  
241 function and conformational stability might be related. Focusing on Fig. 5I-L, there were  
242 large differences in the fluctuation level of Trp229. E208Q\_Gal3 (Fig. 5K) showed small  
243 movements of Trp229, but other structures showed much larger fluctuations (Fig. 5I, J, L ).  
244 These results suggest that this Trp is normally flipped and forms a  $\pi$ - $\pi$  interaction to anchor  
245 the ligand in the proper position upon arrival. A histogram of the dihedral angle is shown in  
246 Fig. S4.

247 As regards the ligand binding site of the CBM, a comparison of each chain of the  
248 E208A\_Gal3 asymmetric unit showed no significant difference in the vibration levels of each  
249 residue involved in ligand binding (Fig. 6). However, ensemble refinement revealed that  
250 Gal\_site 1 and Gal\_site 2 do not show huge fluctuations, while Gal\_site 3 has many  
251 conformations. They include the same conformation of each chain Gal of X-ray  
252 crystallography. Interestingly, a spatial difference in fluctuations was observed between  
253 ligands bound to the catalytic site and to the ligand binding site of CBM35 (Fig. 7). At the  
254 catalytic site, Gal<sub>-1</sub> is anchored in the appropriate position, and Gal<sub>+2</sub> appears to fluctuate in a  
255 planar fashion as it interacts with the surrounding residues. In the CBM, it was inferred that  
256 Gal\_site 1 is fixed and Gal\_site 3 is adsorbed at the appropriate location at the binding site  
257 while fluctuating in three dimensions.

258 **Discussion**

259 Most exo- $\beta$ -1,3-galactanases belonging to GH43\_sub24 possess CBMs that can be classified  
260 into CBM35 or CBM13 (8). In this study, we elucidated the structure of a  $\beta$ -1,3-galactan  
261 binding module for the first time by solving the structure of a GH43\_sub24 containing  
262 CBM35, and obtained the ligand-bound structures of both the catalytic and sugar binding  
263 domains of *Pc*1,3Gal43A. This is also the first study to reveal the structure of a eukaryotic  
264 exo- $\beta$ -1,3-galactanase. This information will be useful to understand how the CBM35 module  
265 interacts with  $\beta$ -1,3-galactan in combination with the GH43\_sub24 catalytic module.

266

267 *How does Pc1,3Gal43A hydrolyze  $\beta$ -1,3-galactan?*

268 Although catalytic residues such as Glu and Asp are conserved in GH43 as a catalytic acid  
269 and base, respectively, GH43\_sub24 lacks such a base residue. Mewis and co-workers  
270 suggested that GH43\_sub24 may use Gln in the base role via conversion to imidic acid, or use  
271 an exogenous base, or utilize the Grotthuss mechanism of catalysis (8, 12). In this study, we  
272 measured the enzyme activity of six variants of the three residues speculated to be involved in  
273 the catalytic reaction. As shown in Fig. S1, production of Gal by the mutants was not detected  
274 by means of high-performance liquid chromatography (HPLC) analysis, suggesting that all  
275 three residues are essential for the catalytic activity of *Pc*1,3Gal43A. Glu102, Glu208, and  
276 Gln263 are speculated to serve in C-4 hydroxyl group recognition, as a catalytic acid, and as a



277 catalytic base, respectively. These residues are well conserved in GH43\_sub24, as shown in  
278 Fig. S5.

279 In GH43\_sub24, only bacterial enzyme structures have been solved so far  
280 ([http://www.cazy.org/GH43\\_24.html](http://www.cazy.org/GH43_24.html)). In order to understand the catalytic mechanism of  
281 *Pc1,3Gal43A*, we compared its structure with those of BT3683 and *Ct1,3Gal43A* (Fig. 8).  
282 Most of the residues that interact with ligands are conserved in these three enzymes. In subsite  
283 -1, all residues, Glu57, Glu102, Arg103, Tyr126, Asp158, Glu208, Trp229, and Gln263, of  
284 *Pc1,3Gal43A* are conserved, indicating that the binding mode at subsite -1 is fully conserved  
285 in GH43\_sub24. Based on the results of ensemble refinement, Trp229 showed huge  
286 fluctuation, especially in the apo structure (Fig. 5I-L). Trp541 of BT3683, which corresponds  
287 to Trp229 of *Pc1,3Gal43A*, has a polar interaction with Gal (12). Trp229 fluctuates in solution  
288 and plays a role in holding the substrate at the catalytic site through polar interactions. On the  
289 other hand, Asn179 and Thr226 of *Pc1,3Gal43A* are replaced by Asp490 and Cys538 in  
290 BT3683 and by Glu199 and Cys247 in *Ct1,3Gal43A*. Since all of these enzymes can  
291 accommodate a  $\beta$ -1,6-branched side chain (6, 12, 28), we considered that these residues are  
292 not related the mechanism of side-chain accommodation.

293 The bypass mechanism of *Pc1,3Gal43A*, which enables accommodation of the  
294  $\beta$ -1,6-galactan side-chain so that the  $\beta$ -1,3-galactan main chain can be cleaved, appears to  
295 depend on the orientation of the C-6 methylol group of Gal3 at each subsite. The C-6

296 methylol group of Gal<sub>-1</sub> is exposed to the solvent, so that the side chain can be accommodated  
297 externally. The C-6 methylol groups of Gal<sub>+1</sub> and Gal<sub>+2</sub> are also exposed to the solvent, so that  
298 the enzyme should be able to cleave the  $\beta$ -1,3-linkage of continuously  $\beta$ -1,6-substituted  
299 galactan, and a similar situation has been reported for BT3683 (12). Moreover, there are  
300 spaces near the non-reducing terminal Gal in these enzymes (12, 29). This enables the  
301 enzymes to degrade the main chain, even if the side chain contains multiple carbohydrates.  
302 Similarly,  $\beta$ -1,3-glucanases belonging to GH55 also bypass the  $\beta$ -1,6-glucan side chain and  
303 degrade  $\beta$ -1,3-glucan from the non-reducing end (29, 30). Comparing the surface structure of  
304 the catalytic site of *Pc*1,3Gal43A with that of these GH55 exo- $\beta$ -1,3-glucanase from *P.*  
305 *chrysosporium* (*Pc*Lam55A), we see that *Pc*1,3Gal43A has a small pocket-like space capable  
306 of accepting the C-6 side chain of Gal at subsite -1 (Fig. 9A and B). In addition, the C-6  
307 methylol group of Gals, located at the positive subsites of *Pc*1,3Gal43A, are exposed to  
308 solvent in a similar manner to that reported for *Sacte*Lam55A, GH55 exo- $\beta$ -1,3-glucanase  
309 from *Streptomyces* sp. SirexAA-E (Fig. 9A and C). Structures capable of accepting  
310 non-reducing terminal Gal with  $\beta$ -1,6-linked Gal are conserved among GH43\_sub24 of  
311 known structure (Fig. 8 and S5). In the non-bypassing GH3 *Hypocrea jecorina*  $\beta$ -glucosidase  
312 (*Hj*Cel3A), the C-6 hydroxyl group of non-reducing glucose is oriented toward the enzyme,  
313 introducing steric hindrance (Fig. 9D; 31). In other words, enzymes bypassing side chains  
314 have a space adjacent to C-6 of the non-reducing terminal sugar, and the positive subsites are

315 particularly wide, allowing side chains of the substrate to be accommodated. In contrast,  
316 enzymes unable to bypass the side chain have no space next to the -1 subsite and have a  
317 narrow entrance to the catalytic site, so that they are unable to accommodate side chains (Fig.  
318 9D).

319           Although the electron density of Gal3 was observed in the present study,  
320 *Pc1,3Gal43A* is proposed to have four subsites ranging from -1 to +3, based on biochemical  
321 experiments (6). As mentioned above, although *Pc1,3Gal43A* has a structure capable of  
322 accepting the C-6 side chain, its degradation activity towards  $\beta$ -1,3/1,6-galactan is only  
323 approximately one-fifth that of the linear  $\beta$ -1,3-galactan (6). This difference in reactivity may  
324 be due to the structure of the sugar. The  $\beta$ -1,3-galactan in solution has a right-handed triple  
325 helical structure with 6 to 8 Gal residues per turn (32, 33), with the C-6 methylol group  
326 pointing outward to avoid collisions between the  $\beta$ -1,6-bonded Gal side chains (32). However,  
327 as shown in Fig. S6, Gal3 bound to the catalytic site of *Pc1,3Gal43A* is anchored to the  
328 enzyme, so that the helix of the glycans differs from the usual state in solution. Therefore, the  
329 reason why the hydrolytic activity of *Pc1,3Gal43A* towards  $\beta$ -1,3/1,6-galactan is lower than  
330 that towards  $\beta$ -1,3-galactan may be interference between the  $\beta$ -1,6-Gal(s) side chains as a  
331 result of changes in the helical state of the main chain.

332

333 *How does PcCBM35 recognize  $\beta$ -1,3-galactan?*

334 Although the amino acid sequence similarity of CBM35s is not so high, important residues  
335 involved in ligand binding are well conserved (17). The modules belonging to CBM35 can be  
336 divided into four clades according to the mode of ligand binding, and the diversity in ligand  
337 binding and in the calcium ion-coordinating residue account for the various ligand binding  
338 specificities (17, Fig. 10A). Moreover, the residues involved in ligand binding of *PcCBM35*  
339 differ from those of CBM35, which binds to  $\alpha$ -Gal of galactomannan. This CBM is one part  
340 of a protein predicted to be the  $\beta$ -xylosidase of *C. thermocellum* cellulosomal protein  
341 (Cte\_2137; Fig. 10), which belongs to the same cluster as *PcCBM35* (17). There are some  
342 differences between the residues interacting with  $\alpha$ -Gal of Cte\_2137 and those interacting  
343 with  $\beta$ -Gal of *PcCBM35*. For instance, the regions of Ala352 to Tyr355 and Tyr438 to Asp441  
344 of *PcCBM35* correspond to Val39 to Gly42 and Ser136 to Asn140 of Cte\_2137, which are  
345 related to ligand specificity (Fig. 10). Especially, Asn140 of Cte\_2137 is not conserved but  
346 replaced Asp441 in *PcCBM35* and is located at the bottom of the ligand binding site.  
347 Furthermore, Trp108 of Cte\_2137, which is conserved in *PcCBM35*, plays a key role in  
348 stacking the pyranose ring (17), while in CBM35 of *Pc1,3Gal43A*, this Trp residue is replaced  
349 with Gly (Fig. 10B). In other words, although *PcCBM35* and Cte\_2137 are in the same  
350 cluster, the residues involved in ligand recognition are different, and this difference affects the  
351 discrimination between  $\beta$ -Gal and  $\alpha$ -Gal, and between galactan and galactomannan. It is still  
352 unclear how CBM35s acquire such variation of binding specificity within a similar binding

353 architecture. However, a detailed understanding of the molecular mechanisms of  
354 polysaccharide recognition by CBM35 will be essential for efficient utilization of various  
355 types of biomass.

356 In conclusion, we have determined the crystal structure of the catalytic and binding  
357 domains of *Pc1,3Gal43A* with the aim of reaching a detailed understanding of the mechanism  
358 of substrate accommodation by side-chain-bypassing galactanase. *Pc1,3Gal43A* uses Glu as  
359 the catalytic acid and Gln as the catalytic base, and has a structure in which the side chain of  
360 the substrate does not interfere with the catalytic reaction, thus making it possible to degrade  
361 the  $\beta$ -1,3-galactan main chain of AGPs despite the presence of the  $\beta$ -1,6-galactan side chain.  
362 Thus, although polysaccharides have a variety of molecular decorations, it appears that the  
363 structures of the degrading enzymes enable them to recognize specific features of the  
364 substrate while accommodating the variations. The introduction of mutations in substrate  
365 recognition residues to create enzymes with altered substrate recognition properties is  
366 expected to be helpful in the structural analysis of AGP glycans and also for the preparation of  
367 useful oligosaccharides.

## 368 **Experimental procedures**

### 369 *Expression of Pc1,3Gal43A and its mutants*

370 The E208Q, E208A, E102Q, E102A, Q263E, and Q263A mutants were constructed by  
371 inverse PCR using PrimeSTAR MAX (Takara, Tokyo, Japan). For crystallization,  
372 *Pc1,3Gal43A* WT, E208Q, and E208A from *P. chrysosporium* were expressed in *P. pastoris*  
373 and purified as previously reported (7). For reactivity assay, WT and mutants were purified by  
374 using SkillPak TOYOPEARL Phenyl-650M (c.v. = 5 ml, Tosoh, Tokyo, Japan) equilibrated  
375 with 20 mM sodium acetate buffer, pH 4.0, containing 1 M ammonium sulfate, and the  
376 enzymes were eluted with 20 mM sodium acetate buffer, pH 4.0, containing 0.7 M  
377 ammonium sulfate. SeMet-labeled *Pc1,3Gal43A* was expressed as previously reported (7).

378

### 379 *Preparation for $\beta$ -1,3-galactooligosaccharides and crystallization of Pc1,3Gal43A*

380 Gal2 and Gal3 were prepared as previously reported (6). The protein solution was  
381 concentrated to  $A_{280}$  of 10 ~ 15 and used for the crystallization setup. The WT plate crystal  
382 used for data collection was obtained from a reservoir of 2.1 M ammonium sulfate, 0.1 M  
383 citrate buffer, pH 5.5. Other WT crystals were obtained from solutions in 16 % (w/v)  
384 polyethylene glycol (PEG) 10000, 0.1 M ammonium sulfate, 0.1 M bis-tris, pH 5.5, and 5.0 %  
385 (v/v) glycerol. SeMet crystals were obtained from 16 % (w/v) PEG 10000, 95 mM  
386 ammonium sulfate, 95 mM bis-tris, pH 5.5, and 4.8 % (v/v) glycerol. Two types of crystals,

387 thin plate crystals (space group  $P2_1$ ) and rod crystals ( $P2_12_12_1$ ) appeared under the same  
388 condition. Cocrystallization of the E208Q mutant with 10 mM Gal3 in 16 % (w/v) PEG  
389 10000, 95 mM ammonium sulfate, 95 mM bis-tris, pH 5.5, and 4.8 % (v/v) glycerol afforded  
390 thin plate crystals. The E208A mutant was cocrystallized with 10 mM Gal3 in 0.2 M  
391 potassium nitrate, 15% (w/v) PEG 6000, 20 mM sodium citrate, pH 4.5, and 5 % glycerol to  
392 afford bipyramidal crystals.

393

#### 394 *Data collection and structure determination*

395 Diffraction experiments for *Pc1,3Gal43A* crystals were conducted at the beamlines of the  
396 Photon Factory (PF) or Photon Factory Advanced Ring (PF-AR), High Energy Accelerator  
397 Research Organization, Tsukuba, Japan (Table 1). Diffraction data were collected using CCD  
398 detectors (Area Detector Systems Corp., Poway, CA, USA). Crystals were cryocooled in a  
399 nitrogen gas stream to 95 K. For data collection of the WT enzyme complexed with Gal3,  
400 *Pc1,3Gal43A* crystals were soaked in a drop containing 1 % (w/v) Gal3 for 10 min before the  
401 diffraction experiment. The data were integrated and scaled using the programs DENZO and  
402 SCALEPACK in the HKL2000 program suite (34)

403 Crystal structure was determined by means of the multiwavelength anomalous dispersion  
404 method using a SeMet-labeled crystal (7). Initial phases were calculated using the  
405 SOLVE/RESOLVE program (35) from five selenium atom positions. The resultant

406 coordinates were subjected to the auto-modeling ARP/wARP program (36) in the CCP4  
407 program suite (37), and manual model building and molecular refinement were performed  
408 using Coot (version 0.8.9, University of Oxford, Oxfordshire, England; 46), REFMAC5  
409 (version 7.0.063, Science & Technology Facilities Council, England; 47), phenix.refine (40),  
410 and phenix.ensemble\_refinement (27, 41, 42) in the Phenix suite of programs (version  
411 1.13-2998-000, Lawrence Berkeley National Laboratory, USA; 51). The refinement statistics  
412 are summarized in Table 2.

413 For the analyses of WT, and ligand bound structures, structural determination was  
414 conducted by the molecular replacement method with the MolRep program (44) in the CCP4  
415 program suite using the SeMet or ligand-free structure as the starting model. Bound sugars,  
416 water molecules and crystallization agents were modelled into the observed electron density  
417 difference maps. Calcium ion was modelled based on the electron density map and the  
418 coordination distances. Three N-glycans were observed, and the identified sugars were  
419 modelled. The stereochemistry of the models was analyzed with LigPlot + (version 1.4.5; 53,  
420 54) and structural drawings were prepared using PyMOL (version 2.2.3, Schrödinger, LLC).  
421 The atomic coordinates and structure factors (codes 7BYS, 7BYT, 7BYV, and 7BYX) have  
422 been deposited in the Protein Data Bank (<http://wwpdb.org/>).

423

424 *Enzymatic activity assay of Pcl,3Gal43A and its mutants*



425 To evaluate the reactivity towards Gal2 and Gal3 of WT and each mutant, 20 nM enzyme was  
426 incubated with 0.263 or 0.266 mM galactooligosaccharides in 20 mM sodium acetate, pH 5.0,  
427 for 30 min at 30 °C, respectively. The reaction was stopped by heating at 95 °C for 5 min. The  
428 supernatant was separated with 75% (v/v) acetonitrile on a Shodex Asahipak NH2P-50 4E  
429 column (Showa Denko, Tokyo, Japan), and the amount of released Gal was determined by  
430 HPLC (LC-2000 series; Jasco, Tokyo, Japan) with a Corona charged aerosol detector (ESA  
431 Biosciences, now Thermo Fisher Scientific Corporation, Massachusetts, USA). One unit of  
432 enzyme activity was defined as the amount of enzyme that releases 1 µmol of Gal per one  
433 minute per one nmol of enzyme under our experimental conditions.

434

#### 435 **Acknowledgments**

436 We would like to thank Dr. Takuya Ishida (Japan Aerospace Exploration Agency) for helping  
437 with the crystallization and structure refinement. We also thank the staff of Photon Factory  
438 for X-ray data collection.

439

#### 440 **Author contributions**

441 K. M., N. K., and Z.F. solved and refined structures; K.M. and N. S. assayed enzymatic  
442 activity; T. K. and Y. T. prepared galactooligosaccharides (Gal2 and Gal3); K. M., M. S, K. I,  
443 and S.K. wrote the manuscript, and all authors commented on the manuscript.

444

#### 445 **Funding and additional information**

446 This research was partially supported by a Grant-in-Aid for Scientific Research (B)  
447 19H03013 to K.I.) from the Japan Society for the Promotion of Science (JSPS) and a  
448 Grant-in-Aid for Innovative Areas from the Japanese Ministry of Education, Culture, Sports,  
449 and Technology (MEXT) (No. 18H05494 to K.I.). In addition, K.I. thanks Business Finland  
450 (BF, formerly the Finnish Funding Agency for Innovation (TEKES)) for support via the  
451 Finland Distinguished Professor (FiDiPro) Program “Advanced approaches for enzymatic  
452 biomass utilization and modification (BioAD)”.

453

#### 454 **Conflict of interest**

455 The authors declare no conflicts of interest associated with this manuscript.

456

457 References

- 458 1. Tsumuraya, Y., Hashimoto, Y., Yamamoto, S., and Shibuya, N. (1984) Structure of  
459 L-arabino-D-galactan-containing glycoproteins from radish leaves. *Carbohydr. Res.*  
460 **134**, 215–228
- 461 2. Majewska-Sawka, A., and Nothnagel, E. A. (2000) The Multiple Roles of  
462 Arabinogalactan Proteins in Plant Development. *Plant Physiol.* **122**, 3–9
- 463 3. Ellis, M., Egelund, J., Schultz, C. J., and Bacic, A. (2010) Arabinogalactan-proteins:  
464 Key regulators at the cell surface? *Plant Physiol.* **153**, 403–419
- 465 4. Tsumuraya, Y., Nobuyuki, M., Yohichi, H., and Kováč, P. (1990) Purification of an  
466 Exo- $\beta$ -(1-3)-D-galactanase of *Irpex lacteus* (*Polyporus tulipiferae*) and its action on  
467 arabinogalactan-proteins. *J. Biol. Chem.* **265**, 7207–7215
- 468 5. Pellerin, P., and Brillouet, J. M. (1994) Purification and properties of an  
469 exo-(1 $\rightarrow$ 3)- $\beta$ -D-galactanase from *Aspergillus niger*. *Carbohydr. Res.* **264**, 281–291
- 470 6. Ichinose, H., Yoshida, M., Kotake, T., Kuno, A., Igarashi, K., Tsumuraya, Y.,  
471 Samejima, M., Hirabayashi, J., Kobayashi, H., and Kaneko, S. (2005) An  
472 exo- $\beta$ -1,3-galactanase having a novel  $\beta$ -1,3-galactan-binding module from  
473 *Phanerochaete chrysosporium*. *J. Biol. Chem.* **280**, 25820–25829
- 474 7. Ishida, T., Fujimoto, Z., Ichinose, H., Igarashi, K., Kaneko, S., and Samejima, M.  
475 (2009) Crystallization of selenomethionyl exo- $\beta$ -1,3-galactanase from the

- 476 basidiomycete *Phanerochaete chrysosporium*. *Acta Crystallogr. Sect. F Struct. Biol.*  
477 *Cryst. Commun.* **65**, 1274–1276
- 478 8. Mewis, K., Lenfant, N., Lombard, V., and Henrissat, B. (2016) Dividing the large  
479 glycoside hydrolase family 43 into subfamilies: A motivation for detailed enzyme  
480 characterization. *Appl. Environ. Microbiol.* **82**, 1686–1692
- 481 9. Davies, G., and Henrissat, B. (1995) Structures and mechanisms of glycosyl hydrolases.  
482 *Structure.* **3**, 853–859
- 483 10. Rye, C. S., and Withers, S. G. (2000) Glycosidase mechanisms. *Curr. Opin. Chem.*  
484 *Biol.* **4**, 573–580
- 485 11. Cartmell, A., McKee, L. S., Pena, M. J., Larsbrink, J., Brumer, H., Kaneko, S.,  
486 Ichinose, H., Lewis, R. J., Viksø-Nielsen, A., Gilbert, H. J., and Marles-Wright, J.  
487 (2011) The structure and function of an arabinan-specific  $\alpha$ -1,2-arabinofuranosidase  
488 identified from screening the activities of bacterial GH43 glycoside hydrolases. *J. Biol.*  
489 *Chem.* **286**, 15483–15495
- 490 12. Cartmell, A., Muñoz-Muñoz, J., Briggs, J. A., Ndeh, D. A., Lowe, E. C., Baslé, A.,  
491 Terrapon, N., Stott, K., Heunis, T., Gray, J., Yu, L., Dupree, P., Fernandes, P. Z., Shah,  
492 S., Williams, S. J., Labourel, A., Trost, M., Henrissat, B., and Gilbert, H. J. (2018) A  
493 surface endogalactanase in *Bacteroides thetaiotaomicron* confers keystone status for  
494 arabinogalactan degradation. *Nat. Microbiol.* **3**, 1314–1326

- 495 13. Jiang, D., Fan, J., Wang, X., Zhao, Y., Huang, B., Liu, J., and Zhang, X. C. (2012)  
496 Crystal structure of 1,3Gal43A, an exo- $\beta$ -1,3-galactanase from *Clostridium*  
497 *thermocellum*. *J. Struct. Biol.* **180**, 447–457
- 498 14. Igarashi, K., Ishida, T., Hori, C., and Samejima, M. (2008) Characterization of an  
499 endoglucanase belonging to a new subfamily of glycoside hydrolase family 45 of the  
500 basidiomycete *Phanerochaete chrysosporium*. *Appl. Environ. Microbiol.* **74**, 5628–  
501 5634
- 502 15. Nakamura, A., Ishida, T., Kusaka, K., Yamada, T., Fushinobu, S., Tanaka, I., Kaneko,  
503 S., Ohta, K., Tanaka, H., Inaka, K., Higuchi, Y., Niimura, N., Samejima, M., and  
504 Igarashi, K. (2015) “Newton’s cradle” proton relay with amide – imidic acid  
505 tautomerization in inverting cellulase visualized by neutron crystallography. *Sci. Adv.*  
506 **1:e1500263**, 1–7
- 507 16. Montanier, C., Van Bueren, A. L., Dumon, C., Flint, J. E., Correia, M. A., Prates, J. A.,  
508 Firbank, S. J., Lewis, R. J., Grondin, G. G., Ghinet, M. G., Gloster, T. M., Herve, C.,  
509 Knox, J. P., Talbot, B. G., Turkenburg, J. P., Kerovuo, J., Brzezinski, R., Fontes, C. M.  
510 G. A., Davies, G. J., Boraston, A. B., and Gilbert, H. J. (2009) Evidence that family 35  
511 carbohydrate binding modules display conserved specificity but divergent function.  
512 *Proc. Natl. Acad. Sci. U. S. A.* **106**, 3065–3070
- 513 17. Correia, M. A. S., Abbott, D. W., Gloster, T. M., Fernandes, V. O., Prates, J. A. M.,

- 514 Montanier, C., Dumon, C., Williamson, M. P., Tunnicliffe, R. B., Liu, Z., Flint, J. E.,  
515 Davies, G. J., Henrissat, B., Coutinho, P. M., Fontes, C. M. G. A., and Gilbert, H. J.  
516 (2010) Signature active site architectures illuminate the molecular basis for ligand  
517 specificity in family 35 carbohydrate binding module. *Biochemistry*. **49**, 6193–6205
- 518 18. Couturier, M., Roussel, A., Rosengren, A., Leone, P., Stålbrand, H., and Berrin, J. G.  
519 (2013) Structural and biochemical analyses of glycoside hydrolase families 5 and 26  
520  $\beta$ -(1,4)-mannanases from *Podospora anserina* reveal differences upon  
521 manno-oligosaccharide catalysis. *J. Biol. Chem.* **288**, 14624–14635
- 522 19. Okazawa, Y., Miyazaki, T., Yokoi, G., Ishizaki, Y., Nishikawa, A., and Tonozuka, T.  
523 (2015) Crystal structure and mutational analysis of isomaltodextranase, a member of  
524 glycoside hydrolase family 27. *J. Biol. Chem.* **290**, 26339–26349
- 525 20. Fujimoto, Z., Kishine, N., Suzuki, N., Suzuki, R., Mizushima, D., Momma, M.,  
526 Kimura, K., and Funane, K. (2017) Isomaltooligosaccharide-binding structure of  
527 *Paenibacillus* sp. 598K cycloisomaltooligosaccharide glucanotransferase. *Biosci. Rep.*  
528 **37**, 1–11
- 529 21. Suzuki, N., Fujimoto, Z., Kim, Y. M., Momma, M., Kishine, N., Suzuki, R., Suzuki, S.,  
530 Kitamura, S., Kobayashi, M., Kimura, A., and Funane, K. (2014) Structural  
531 Elucidation of the Cyclization Mechanism of  $\alpha$ -1,6-Glucan by *Bacillus circulans*  
532 T-3040 Cycloisomaltooligosaccharide Glucanotransferase. *J. Biol. Chem.* **289**, 12040–

- 533 12051
- 534 22. Light, S. H., Cahoon, L. A., Halavaty, A. S., Freitag, N. E., and Anderson, W. F.  
535 (2016) Structure to function of an  $\alpha$ -glucan metabolic pathway that promotes *Listeria*  
536 *monocytogenes* pathogenesis. *Nat. Microbiol.* **2**, 1–10
- 537 23. Fujimoto, Z., Suzuki, N., Kishine, N., Ichinose, H., Momma, M., Kimura, A., and  
538 Funane, K. (2017) Carbohydrate-binding architecture of the multi-modular  
539  $\alpha$ -1,6-glucosyltransferase from *Paenibacillus* sp. 598K, which produces  
540  $\alpha$ -1,6-glucosyl- $\alpha$ -glucosaccharides from starch. *Biochem. J.* **474**, 2763–2778
- 541 24. Ji, S., Dix, S. R., Aziz, A. A., Sedelnikova, S. E., Baker, P. J., Rafferty, J. B., Bullough,  
542 P. A., Tzokov, S. B., Agirre, J., Li, F. L., and Rice, D. W. (2019) The molecular basis  
543 of endolytic activity of a multidomain alginate lyase from *Defluviitalea phaphyphila*, a  
544 representative of a new lyase family, PL39. *J. Biol. Chem.* **294**, 18077–18091
- 545 25. Mandelli, F., De Morais, M. A. B., De Lima, E. A., Oliveira, L., Persinoti, G. F., and  
546 Murakami, M. T. (2020) Spatially remote motifs cooperatively affect substrate  
547 preference of a ruminal GH26-type endo- $\beta$ -1,4-mannanase. *J. Biol. Chem.* **295**, 5012–  
548 5021
- 549 26. Guillén, D., Sánchez, S., and Rodríguez-Sanoja, R. (2010) Carbohydrate-binding  
550 domains: Multiplicity of biological roles. *Appl. Microbiol. Biotechnol.* **85**, 1241–1249
- 551 27. Burnley Tom, B., Afonine, P. V., Adams, P. D., and Gros, P. (2012) Modelling

- 552 dynamics in protein crystal structures by ensemble refinement. *Elife*. **2012**, 1–29
- 553 28. Ichinose, H., Kuno, A., Kotake, T., Yoshida, M., Sakka, K., Hirabayashi, J.,  
554 Tsumuraya, Y., and Kaneko, S. (2006) Characterization of an exo- $\beta$ -1,3-galactanase  
555 from *Clostridium thermocellum*. *Appl. Environ. Microbiol.* **72**, 3515–3523
- 556 29. Bianchetti, C. M., Takasuka, T. E., Deutsch, S., Udell, H. S., Yik, E. J., Bergeman, L.  
557 F., and Fox, B. G. (2015) Active site and laminarin binding in glycoside hydrolase  
558 family 55. *J. Biol. Chem.* **290**, 11819–11832
- 559 30. Ishida, T., Fushinobu, S., Kawai, R., Kitaoka, M., Igarashi, K., and Samejima, M.  
560 (2009) Crystal Structure of Glycoside Hydrolase Family 55  $\beta$ -1,3-Glucanase from the  
561 Basidiomycete. *J. Biol. Chem.* **284**, 10100–10109
- 562 31. Karkehabadi, S., Helmich, K. E., Kaper, T., Hansson, H., Mikkelsen, N. E.,  
563 Gudmundsson, M., Piens, K., Furdala, M., Banerjee, G., Scott-Craig, J. S., Walton, J.  
564 D., Phillips, G. N., and Sandgren, M. (2014) Biochemical characterization and crystal  
565 structures of a fungal family 3  $\beta$ -glucosidase, Cel3A from *Hypocrea jecorina*. *J. Biol.*  
566 *Chem.* **289**, 31624–31637
- 567 32. Chandrasekaran, R., and Janaswamy, S. (2002) Morphology of western larch  
568 arabinogalactan. *Carbohydr. Res.* **337**, 2211–2222
- 569 33. Kitazawa, K., Tryfona, T., Yoshimi, Y., Hayashi, Y., Kawauchi, S., Antonov, L.,  
570 Tanaka, H., Takahashi, T., Kaneko, S., Dupree, P., Tsumuraya, Y., and Kotake, T.



- 571 (2013)  $\beta$ -galactosyl Yariv Reagent Binds To the  $\beta$ -1,3-Galactan of Arabinogalactan  
572 Proteins. *Plant Physiol.* **161**, 1117–1126
- 573 34. Otwinowski, Z., and Minor, W. (1997) Processing of X-ray diffraction data collected in  
574 oscillation mode. *Methods Enzymol.* **276**, 307–326
- 575 35. Terwilliger, T. C., and Berendzen, J. (1999) Automated MAD and MIR structure  
576 solution. *Acta Crystallogr. Sect. D Biol. Crystallogr.* **55**, 849–861
- 577 36. Perrakis, A., Morris, R., and Lamzin, V. S. (1999) Automated protein model building  
578 combined with iterative structure refinement. *Nat. Struct. Biol.* **6**, 458–463
- 579 37. Winn, M. D., Ballard, C. C., Cowtan, K. D., Dodson, E. J., Emsley, P., Evans, P. R.,  
580 Keegan, R. M., Krissinel, E. B., Leslie, A. G. W., McCoy, A., McNicholas, S. J.,  
581 Murshudov, G. N., Pannu, N. S., Potterton, E. A., Powell, H. R., Read, R. J., Vagin, A.,  
582 and Wilson, K. S. (2011) Overview of the CCP4 suite and current developments. *Acta*  
583 *Crystallogr. Sect. D Biol. Crystallogr.* **67**, 235–242
- 584 38. Emsley, P., Lohkamp, B., Scott, W. G., and Cowtan, K. (2010) Features and  
585 development of Coot. *Acta Crystallogr. Sect. D Biol. Crystallogr.* **66**, 486–501
- 586 39. Murshudov, G. N., Vagin, A. A., and Dodson, E. J. (1997) Refinement of  
587 macromolecular structures by the maximum-likelihood method. *Acta Crystallogr. Sect.*  
588 *D Biol. Crystallogr.* **53**, 240–255
- 589 40. Afonine, P. V., Grosse-Kunstleve, R. W., Echols, N., Headd, J. J., Moriarty, N. W.,

- 590 Mustyakimov, M., Terwilliger, T. C., Urzhumtsev, A., Zwarta, P. H., and Adams, P. D.  
591 (2012) Towards automated crystallographic structure refinement with phenix . refine  
592 research papers. *Acta Crystallogr. - Sect. D Biol. Crystallogr.* **68**, 352–367
- 593 41. Burnley, B. T., and Gros, P. (2013) phenix.ensemble\_refinement: a test study of apo  
594 and holo BACE1. *Comput. Crystallogr. Newsl.* **4**, 51–58
- 595 42. Forneris, F., Burnley, B. T., and Gros, P. (2014) Ensemble refinement shows  
596 conformational flexibility in crystal structures of human complement factor D. *Acta*  
597 *Crystallogr. Sect. D Biol. Crystallogr.* **70**, 733–743
- 598 43. Liebschner, D., Afonine, P. V., Baker, M. L., Bunkoczi, G., Chen, V. B., Croll, T. I.,  
599 Hintze, B., Hung, L. W., Jain, S., McCoy, A. J., Moriarty, N. W., Oeffner, R. D., Poon,  
600 B. K., Prisant, M. G., Read, R. J., Richardson, J. S., Richardson, D. C., Sammito, M. D.,  
601 Sobolev, O. V., Stockwell, D. H., Terwilliger, T. C., Urzhumtsev, A. G., Videau, L. L.,  
602 Williams, C. J., and Adams, P. D. (2019) Macromolecular structure determination  
603 using X-rays, neutrons and electrons: Recent developments in Phenix. *Acta Crystallogr.*  
604 *Sect. D Struct. Biol.* **75**, 861–877
- 605 44. Vagin, A., and Teplyakov, A. (2010) Molecular replacement with MOLREP. *Acta*  
606 *Crystallogr. Sect. D Biol. Crystallogr.* **66**, 22–25
- 607 45. Wallace, A. C., Laskowski, R. A., and Thornton, J. M. (1995) LIGPLOT: a program to  
608 generate schematic diagrams of protein-ligand interactions The LIGPLOT program

- 609 automatically generates schematic 2-D representations of protein-ligand complexes  
610 from standard Protein Data Bank file input. *Protein Eng.* **8**, 127–134
- 611 46. Laskowski, R. A., and Swindells, M. B. (2011) LigPlot+: Multiple ligand-protein  
612 interaction diagrams for drug discovery. *J. Chem. Inf. Model.* **51**, 2778–2786
- 613 47. Ashkenazy, H., Erez, E., Martz, E., Pupko, T., and Ben-Tal, N. (2010) ConSurf 2010:  
614 Calculating evolutionary conservation in sequence and structure of proteins and nucleic  
615 acids. *Nucleic Acids Res.* **38**, 529–533
- 616 48. Landau, M., Mayrose, I., Rosenberg, Y., Glaser, F., Martz, E., Pupko, T., and Ben-Tal,  
617 N. (2005) ConSurf 2005: The projection of evolutionary conservation scores of  
618 residues on protein structures. *Nucleic Acids Res.* **33**, 299–302
- 619 49. Celniker, G., Nimrod, G., Ashkenazy, H., Glaser, F., Martz, E., Mayrose, I., Pupko, T.,  
620 and Ben-Tal, N. (2013) ConSurf: Using evolutionary data to raise testable hypotheses  
621 about protein function. *Isr. J. Chem.* **53**, 199–206
- 622 50. Ashkenazy, H., Abadi, S., Martz, E., Chay, O., Mayrose, I., Pupko, T., and Ben-Tal, N.  
623 (2016) ConSurf 2016: an improved methodology to estimate and visualize evolutionary  
624 conservation in macromolecules. *Nucleic Acids Res.* **44**, W344–W350
- 625 51. Glaser, F., Pupko, T., Paz, I., Bell, R. E., Bechor-Shental, D., Martz, E., and Ben-Tal,  
626 N. (2003) ConSurf: Identification of functional regions in proteins by surface-mapping  
627 of phylogenetic information. *Bioinformatics.* **19**, 163–164

- 628 52. Korotkova, O. G., Semenova, M. V., Morozova, V. V., Zorov, I. N., Sokolova, L. M.,  
629 Bubnova, T. M., Okunev, O. N., and Sinitsyn, A. P. (2009) Isolation and properties of  
630 fungal  $\beta$ -glucosidases. *Biochem.* **74**, 569–577
- 631 53. Kumar, S., Stecher, G., Li, M., Knyaz, C., and Tamura, K. (2018) MEGA X:  
632 Molecular evolutionary genetics analysis across computing platforms. *Mol. Biol. Evol.*  
633 **35**, 1547–1549
- 634 54. Stecher, G., Tamura, K., and Kumar, S. (2020) Molecular evolutionary genetics  
635 analysis (MEGA) for macOS. *Mol. Biol. Evol.* **37**, 1237–1239
- 636 55. Robert, X., and Gouet, P. (2014) Deciphering key features in protein structures with  
637 the new ENDscript server. *Nucleic Acids Res.* **42**, 320–324
- 638 56. Bohne, A., Lang, E., and Von Der Lieth, C. W. Der (1998) W3-SWEET: Carbohydrate  
639 modeling by internet. *J. Mol. Model.* **4**, 33–43
- 640 57. Bohne, A., Lang, E., and Von Der Lieth, C. W. (1999) SWEET - WWW-based rapid  
641 3D construction of oligo- and polysaccharides. *Bioinformatics.* **15**, 767–768
- 642

643 Table 1. Data collection statistics

| Data                                     | SeMet                                                                                                   |                                                                                                          |                          |                          |                          | WT                                                                                                       | E208Q                                                                                                     | E208A                                                                                                       |
|------------------------------------------|---------------------------------------------------------------------------------------------------------|----------------------------------------------------------------------------------------------------------|--------------------------|--------------------------|--------------------------|----------------------------------------------------------------------------------------------------------|-----------------------------------------------------------------------------------------------------------|-------------------------------------------------------------------------------------------------------------|
|                                          | WT                                                                                                      | (peak)                                                                                                   | (edge)                   | (low remote)             | (high remote)            | Gal3 soakir                                                                                              | Gal 3 co-cr <sub>3</sub>                                                                                  | Gal3 co-cr <sub>3</sub>                                                                                     |
| Space group                              | <i>P</i> 1                                                                                              | <i>P</i> 2 <sub>1</sub>                                                                                  | <i>P</i> 2 <sub>1</sub>  | <i>P</i> 2 <sub>1</sub>  | <i>P</i> 2 <sub>1</sub>  | <i>P</i> 2 <sub>1</sub> 2 <sub>1</sub> 2 <sub>1</sub>                                                    | <i>P</i> 2 <sub>1</sub>                                                                                   | <i>P</i> 3 <sub>2</sub> 2 <sub>1</sub>                                                                      |
| Unit-cell parameters (Å, °)              | <i>a</i> =40.5<br><i>b</i> =66.3<br><i>c</i> =74.0<br>$\alpha$ =72.0<br>$\beta$ =84.7<br>$\gamma$ =82.1 | <i>a</i> =66.4<br><i>b</i> =50.5<br><i>c</i> =75.8<br>$\alpha$ =90.0<br>$\beta$ =111.9<br>$\gamma$ =90.0 |                          |                          |                          | <i>a</i> =50.8<br><i>b</i> =66.6<br><i>c</i> =106.4<br>$\alpha$ =90.0<br>$\beta$ =90.0<br>$\gamma$ =90.0 | <i>a</i> =66.1<br><i>b</i> =50.4,<br><i>c</i> =75.7<br>$\alpha$ =90.0<br>$\beta$ =111.3<br>$\gamma$ =90.0 | <i>a</i> =156.7<br><i>b</i> =156.7<br><i>c</i> =147.7<br>$\alpha$ =90.0<br>$\beta$ =120.0<br>$\gamma$ =90.0 |
| Beam Line                                | PF BL-5                                                                                                 | PF BL-6A                                                                                                 | PF BL-6A                 | PF BL-6A                 | PF BL-6A                 | PF-AR<br>NW12                                                                                            | PF-AR<br>NE3                                                                                              | PF-AR<br>NE3                                                                                                |
| Detector                                 | ADSC<br>Q315                                                                                            | ADSC<br>Q4R                                                                                              |                          |                          |                          | ADSC<br>Q210                                                                                             | ADSC<br>Q270                                                                                              | ADSC<br>Q270                                                                                                |
| Wavelength (Å)                           | 0.90646                                                                                                 | 0.97882                                                                                                  | 0.97950                  | 0.98300                  | 0.96400                  | 1.0000                                                                                                   | 1.0000                                                                                                    | 1.0000                                                                                                      |
| Resolution (Å)                           | 50-1.40<br>(1.45-1.40)                                                                                  | 50.0-1.80<br>(1.86-1.80)                                                                                 | 50.0-2.00<br>(2.07-2.00) | 50.0-2.00<br>(2.07-2.00) | 50.0-2.00<br>(2.07-2.00) | 100.0-1.5<br>0<br>(1.55-1.50)                                                                            | 50.0-2.50<br>0<br>(2.54-2.50)                                                                             | 100.0-2.3<br>0<br>(2.38-2.30)                                                                               |
| <i>R</i> <sub>sym</sub>                  | 0.054<br>(0.370)                                                                                        | 0.079<br>(0.672)                                                                                         | 0.061<br>(0.307)         | 0.060<br>(0.303)         | 0.062<br>(0.307)         | 0.046<br>(0.109)                                                                                         | 0.143<br>(0.399)                                                                                          | 0.167<br>(0.627)                                                                                            |
| Completeness (%)                         | 95.6<br>(89.0)                                                                                          | 100.0<br>(99.9)                                                                                          | 100.0<br>(100.0)         | 100.0<br>(100.0)         | 100.0<br>(100.0)         | 97.5<br>(94.9)                                                                                           | 96.2<br>(83.0)                                                                                            | 99.1<br>(92.0)                                                                                              |
| Multiplicity                             | 3.8 (3.1)                                                                                               | 14.0<br>(12.6)                                                                                           | 7.2 (6.9)                | 7.2 (6.9)                | 7.2 (7.0)                | 9.2 (8.9)                                                                                                | 4.4 (3.0)                                                                                                 | 9.7 (5.1)                                                                                                   |
| Average <i>I</i> / $\sigma$ ( <i>I</i> ) | 24.4 (2.8)                                                                                              | 36.6 (4.7)                                                                                               | 30.9 (8.3)               | 30.8 (8.2)               | 31.3 (8.2)               | 48.9<br>(21.0)                                                                                           | 13.5 (2.7)                                                                                                | 17.9 (2.7)                                                                                                  |
| Unique reflections                       | 136 692<br>(12 747)                                                                                     | 43 643 (4<br>353)                                                                                        | 31 744 (3<br>139)        | 31 760 (3<br>144)        | 31 780 (3<br>146)        | 57 278 (5<br>493)                                                                                        | 16 007<br>(702)                                                                                           | 92 497 (8<br>510)                                                                                           |
| Observed reflections                     | 520 085                                                                                                 | 613 162                                                                                                  | 227 158                  | 228 381                  | 228 595                  | 524 957                                                                                                  | 69 939                                                                                                    | 900 469                                                                                                     |
| Z                                        | 2                                                                                                       | 1                                                                                                        |                          |                          |                          | 1                                                                                                        | 1                                                                                                         | 4                                                                                                           |

644

645 Table 2. Refinement statistics

| Data                               | WT                               | WT_Gal                           | E208Q_Gal3                       | E208A_Gal3                       |
|------------------------------------|----------------------------------|----------------------------------|----------------------------------|----------------------------------|
| Resolution range                   | 7.997 - 1.398<br>(1.448 - 1.398) | 41.56 - 1.500<br>(1.554 - 1.500) | 29.79 - 2.499<br>(2.588 - 2.499) | 30.66 - 2.300<br>(2.382 - 2.300) |
| Completeness (%)                   | 95.46 (87.82)                    | 97.51 (94.80)                    | 96.41 (85.67)                    | 98.78 (92.17)                    |
| Wilson B-factor                    | 12.76                            | 10.11                            | 29.91                            | 30.40                            |
| Reflections used in refinement     | 136655 (12497)                   | 57105 (5474)                     | 15762 (1381)                     | 92011 (8507)                     |
| Reflections used for R-free        | 6862 (630)                       | 2884 (272)                       | 799 (64)                         | 4568 (441)                       |
| R-work (%)                         | 15.47 (22.50)                    | 13.43 (12.71)                    | 16.62 (25.54)                    | 16.10 (22.39)                    |
| R-free (%)                         | 18.56 (26.28)                    | 16.00 (17.93)                    | 24.39 (42.53)                    | 21.43 (28.28)                    |
| Number of non-hydrogen atoms       | 7966                             | 3923                             | 3576                             | 14570                            |
| macromolecules                     | 6615                             | 3290                             | 3235                             | 12886                            |
| ligands                            | 109                              | 121                              | 114                              | 678                              |
| solvent                            | 1242                             | 512                              | 227                              | 1006                             |
| Protein residues                   | 2106                             | 427                              | 428                              | 1708                             |
| RMS (bonds)                        | 0.008                            | 0.006                            | 0.008                            | 0.011                            |
| RMS (angles)                       | 1.22                             | 0.87                             | 0.94                             | 1.05                             |
| Ramachandran favored (%)           | 97.29                            | 97.41                            | 94.13                            | 95.76                            |
| Ramachandran allowed (%)           | 2.71                             | 2.59                             | 5.87                             | 4.24                             |
| Ramachandran outliers (%)          | 0                                | 0                                | 0                                | 0                                |
| Rotamer outliers (%)               | 0.81                             | 0.55                             | 0.29                             | 0.36                             |
| Clash score                        | 2.06                             | 1.95                             | 6.94                             | 3.50                             |
| Average B-factor (Å <sup>2</sup> ) | 17.21                            | 12.45                            | 30.48                            | 32.98                            |
| macromolecules                     | 14.97                            | 10.57                            | 29.77                            | 31.60                            |
| ligands                            | 29.38                            | 23.33                            | 52.26                            | 56.11                            |
| solvent                            | 28.09                            | 22.02                            | 29.74                            | 35.03                            |
| PDB ID                             | 7BYS                             | 7BYT                             | 7BYV                             | 7BYX                             |

646

647 Table 3. Refinement statistics of ensemble refinement

| Data                               | WT                           | WT_Gal                       | E208Q_Gal3                   | E208A_Gal3                    |
|------------------------------------|------------------------------|------------------------------|------------------------------|-------------------------------|
| Resolution range                   | 7.997-1.398<br>(1.448-1.398) | 41.56-1.500<br>(1.554-1.500) | 29.79-2.499<br>(2.588-2.499) | 30.66-2.300<br>(2.382- 2.300) |
| Completeness (%)                   | 95.97(82)                    | 97.52 (95)                   | 96.47 (88)                   | 98.93(87)                     |
| pTLS (%)                           | 0.9                          | 0.9                          | 0.9                          | 1.0                           |
| Tx                                 | 1.0                          | 0.9                          | 0.3                          | 0.4                           |
| Wilson B-factor                    | 12.8                         | 10.1                         | 29.9                         | 30.4                          |
| Reflections used in refinement     | 136649                       | 57112                        | 15759                        | 91994                         |
| Reflections used for R-free        | 6862                         | 2885                         | 799                          | 4569                          |
| R-work                             | 13.81 (24.36)                | 12.08 (10.68)                | 17.82 (24.73)                | 15.92 (22.56)                 |
| R-free                             | 17.08 (26.30)                | 15.29 (17.10)                | 23.33 (32.75)                | 20.71 (28.84)                 |
| RMS(bonds)                         | 0.008                        | 0.010                        | 0.007                        | 0.008                         |
| RMS(angles)                        | 1.171                        | 1.312                        | 1.078                        | 1.090                         |
| Ramachandran favored (%)           | 94.06                        | 95.39                        | 88.98                        | 92.62                         |
| Ramachandran allowed (%)           | 5.08                         | 4.03                         | 9.19                         | 7.24                          |
| Ramachandran outliers (%)          | 0.86                         | 0.58                         | 1.83                         | 0.74                          |
| Rotamer outliers (%)               | 7.45                         | 7.00                         | 11.05                        | 7.85                          |
| Clash score                        | 0                            | 0                            | 0                            | 0                             |
| Average B-factor (Å <sup>2</sup> ) | 13.65                        | 9.55                         | 28.32                        | 32.83                         |
| macromolecules                     | 13.63                        | 9.54                         | 28.30                        | 32.66                         |
| ligands                            | 14.97                        | 9.82                         | 28.98                        | 36.05                         |
| Molprobity score                   | 1.56                         | 1.45                         | 1.87                         | 1.64                          |
| model number                       | 100                          | 103                          | 20                           | 34                            |

648

649

650 **Figure legends**

651 Fig. 1. Overall structure of *Pc1,3Gal43A*. In the three-dimensional structure of *Pc1,3Gal43A*,  
652 the five blades of the catalytic domain are shown in blue (Gln21-Leu87), cyan  
653 (Ser88-Asp155), green (Ser156-Gly204), yellow (Ala205-Ser247), and orange  
654 (Ala248-Asp297) with successive roman numerals. The CBM (The326-Val448) is shown in  
655 orange. The linker connecting the two domains (Phe298-Gly325) is shown in gray.

656

657 Fig. 2. Gal3 binding mode at the catalytic site.

658 A: The surface structure of the catalytic center. Gal3 is represented as green (carbon) and red  
659 (oxygen) sticks. B: Schematic diagram showing the interaction mode at the catalytic center.  
660 Black, red, and blue show carbon, oxygen, and nitrogen, respectively. Red lines indicate the  
661 hydrophobically interacting residues. This diagram was drawn with LigPlot+ (version 1.4.5).  
662 C: The 2Fo-Fc omit map is drawn as a blue mesh (0.8 sigma). Residues are shown in white  
663 (carbon), red (oxygen), and blue (nitrogen). Gal3 is shown in green (carbon) and red (oxygen).  
664 Yellow dots indicate hydrogen bonds and/or hydrophobic interaction and red spheres show  
665 water molecules interacting with ligands or residues.

666

667 Fig. 3. Surface structures of the CBM.



668 A: Substrate binding mode at CBM35. Green, cyan, magenta, and yellow indicate carbons of  
669 chains A, B, C, and D of E208A\_Gal3, respectively, and red shows oxygen. The left side is  
670 the non-reducing end of Gal3, and the right side is the reducing end. B: calcium ion binding  
671 mode at CBM35. Calcium ion is represented as green spheres and interacting residues are  
672 shown as stick models. Yellow dots indicate interaction.

673

674 Fig. 4. Ligand interaction mode at CBM35.

675 A and E, B and F, C and G, and D and H are chains A, B, C, and D of E208A, respectively.

676 A to D: Interaction modes between ligand and CBM35 residues. Atoms are indicated in the

677 same colors as in Fig. 2. E to G: Schematic diagram showing the interaction mode at CBM35.

678 Atoms are indicated in the same colors as in Fig. 2. Sugar binding sites are named Gal\_site 1,

679 Gal\_site 2, and Gal\_site 3 from the non-reducing end of the sugar, and in this figure, they are

680 labeled 1, 2, and 3, respectively.

681

682 Fig. 5. Results of ensemble refinement at the catalytic site.

683 Each model is divided into three parts for clarity. A (E, I), B (F, J), C (G, K), and D (H, L)

684 show WT, WT\_Gal, E208Q\_Gal3, and E208A\_Gal3, respectively. Although WT and

685 E208A\_Gal3 contained multiple molecules in an asymmetric unit, the results obtained with

686 multiple molecules were considered as an ensemble of one molecule in the present study.

687 Letters indicate the chain names. Atoms are indicated in the same colors as Fig. 2. Gal3 of the  
688 structure of E208Q\_Gal3 obtained by X-ray crystallography is arranged in each figure to  
689 maximize ease of comparison.

690

691 Fig. 6. Results of ensemble refinement at the CBM ligand-binding site.

692 A,B, C, and D: Residues related to ligand interaction. In this figure, Gal3 of chain A of  
693 refined E208A\_Gal3 is drawn for comparison. E, F, G, and H: the ligands of each chain.

694 Green, cyan, and yellow are used in order from the non-reducing terminal Gal. A and E, B and

695 F, C and G, D and H represent chain A, B, C, and D of E208A\_Gal3, respectively. Atoms are

696 indicated in the same colors as Fig. 2.

697

698 Fig. 7. Ligand conformation of ensemble refinement at glance. A: ligand conformation of

699 E208Q\_Gal3 ensemble model. B: ligand conformation of E208A\_Gal3 ensemble models with

700 four chains aligned. Green, cyan, and yellow are used in order from the non-reducing terminal

701 Gal.

702

703 Fig. 8. Catalytic domain structure comparison. A: Visualization of the degree of preservation

704 of GH43\_sub24. The degree of conservation of amino acid residues in the catalytic domain of

705 GH43\_sub24 was visualized using the ConSurf server (<https://consurf.tau.ac.il>), the query for

706 BLAST was set to *Pc1,3Gal43A*, and the conservation degree was analyzed based on 150  
707 amino acid sequences in the ConSurf server (47–51). The conservation degree is shown in  
708 graded color. Preservation degrees are shown in a gradient with cyan for the lowest degree of  
709 preservation and blue for the highest. B: Catalytic domain comparison of *Pc1,3Gal43A* and  
710 two GH43\_sub24 galactanases. Catalytic center of E208Q\_Gal3 of *Pc1,3Gal43A* (white, PDB  
711 ID: 7BYV), BT3683 (cyan, PDB ID: 6EUI), and *Ct1,3Gal43A* (pink, PDB ID: 3VSF). Red,  
712 blue, and yellow represent oxygen atoms, nitrogen atoms, and sulfur atoms, respectively.  
713 Residue names mean *Pc1,3Gal43A*/ BT3683/ *Ct1,3Gal43A*.

714

715 Fig. 9. Structure comparison of the catalytic sites of *Pc1,3Gal43A* (A), GH55  
716  $\alpha$ -D-glucanase from *P. chrysosporium* (B; *PcLam55A*; PDB ID: 3EQO), GH55  
717  $\alpha$ -D-glucanase from *Streptomyces* sp. SirexAA-E (C; *SacteLam55A*; PDB ID 4PF0),  
718 GH3  $\beta$ -glucosidase from *H. jecorina* (C, PDB ID: 3ZYZ).

719 A, B, and C hydrolyze the main chain of  $\beta$ -1,3-galactan or  $\beta$ -1,3-glucan, bypassing  
720  $\beta$ -1,6-branched side chains (6, 29, 30). D hydrolyzes four types of  $\beta$ -bonds, and it does not  
721 bypass side chains (31, 52). The upper panel shows the overall surface structure and the lower  
722 panel shows an enlarged view of the catalytic region. Orange dashed circles indicate the space  
723 near the C-6 position of Gal or glucose at the non-reducing end.

724

725 Figure. 10. Sequence alignment of known CBM35s (A) and structure comparison between  
726 CBM35s of *Pc1,3Gal43A* (B) and *Cte\_2137* (C).

727 A: Taxon names are shown as scientific names, ligand specificity and PDB ID only for brevity.  
728 When the same enzyme contains two CBM35 domains, the taxon name is indicated with 1 on  
729 the N-terminal and 2 on the C-terminal. Gal, Glc, Man, Xyl, and Uronic means ligand  
730 specificities for Gal, glucose, mannose, xylose, and glucuronic acid and/or galacturonic acid,  
731 respectively. Among these, 3ZM8, 6UEH, and 2BGO, which bind to Man, are Type B CBMs,  
732 which show endo-type binding, while the other 14 are all Type C CBMs, which show  
733 exo-type binding. The alignment was built by using MUSCLE on MEGAX: Molecular  
734 Evolutionary Genetics Analysis (53, 54), and the figure was generated with ESPrint  
735 3.0 (<http://esprint.ibcp.fr>; 56). Orange and green boxes represent ligand binding and calcium  
736 ion binding residues, respectively. B and C: Ligand binding residues of *Pc1,3Gal43A* (chain A  
737 of E208A\_Gal3) and *Cte\_2137* (PDB ID: 2WZ8). Red and blue mean oxygen and nitrogen,  
738 respectively. The green stick model represents Gal3.

739

740 Table titles

741 Table 1. Data collection statistics

742 Table 2. Refinement statistics

743 Table 3. Refinement statistics of ensemble refinement

744

745 Fig. 1.

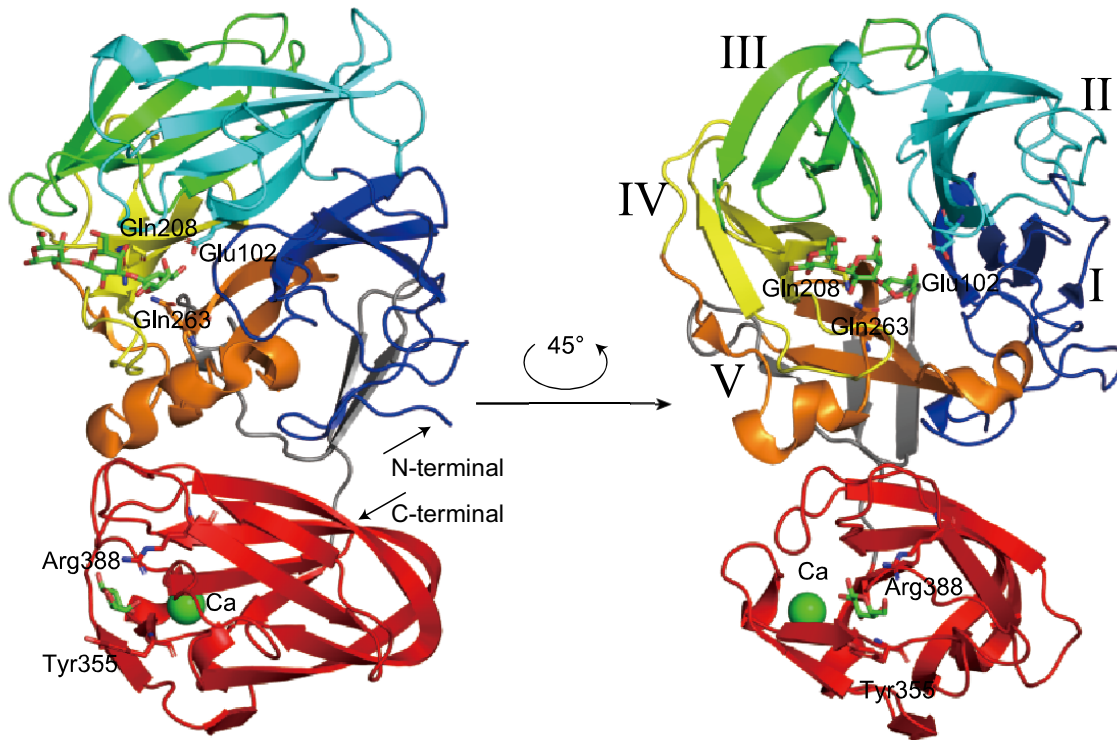

746

747

748

749 Fig. 2.

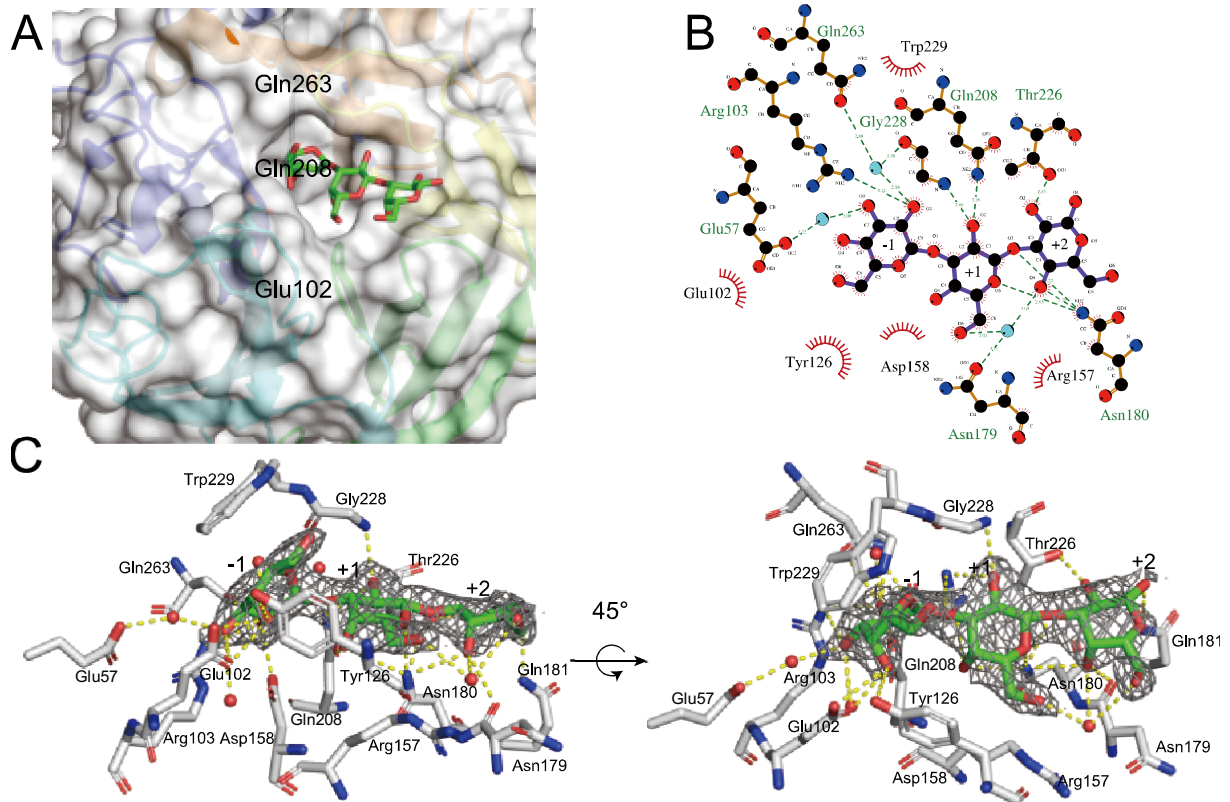

750

751

752 Fig. 3.

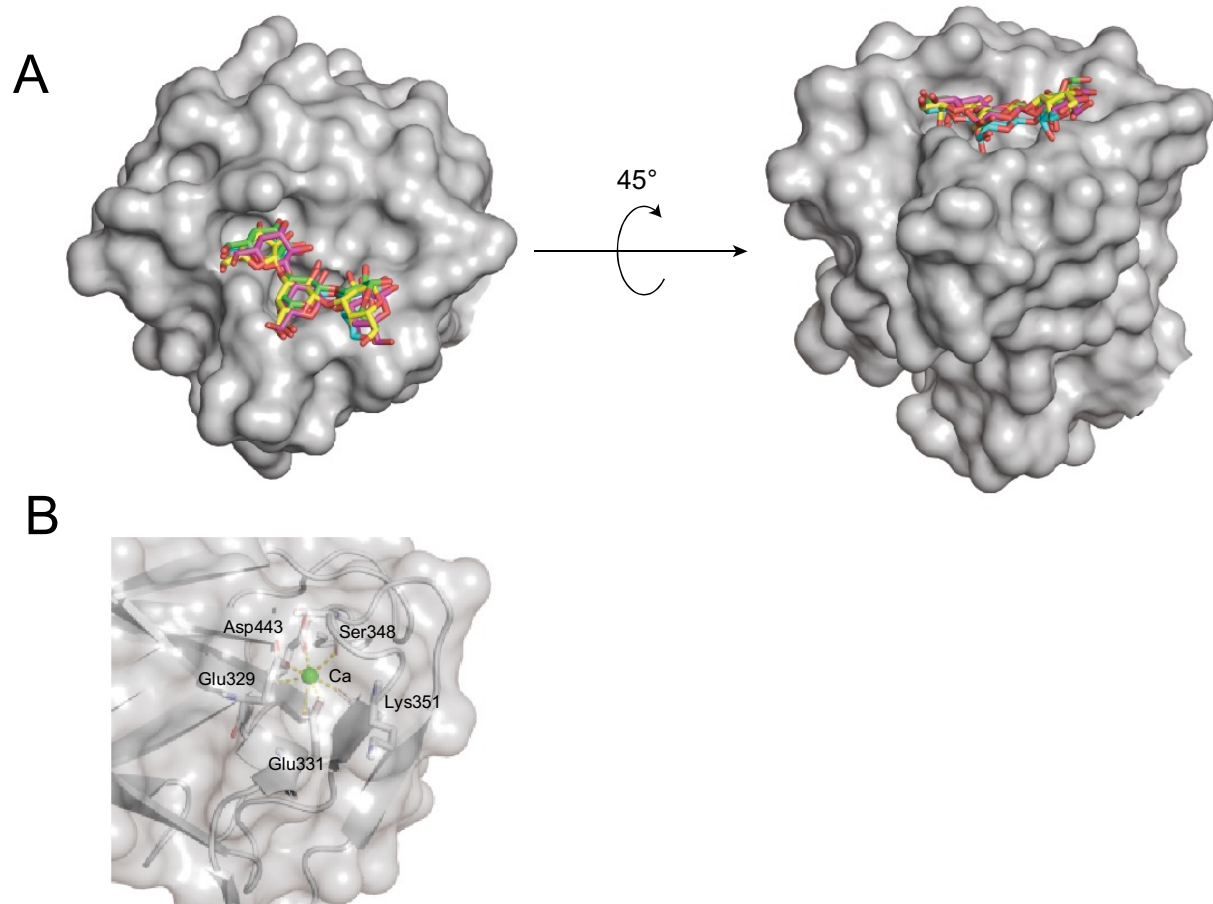

753

754

755 Fig. 4.

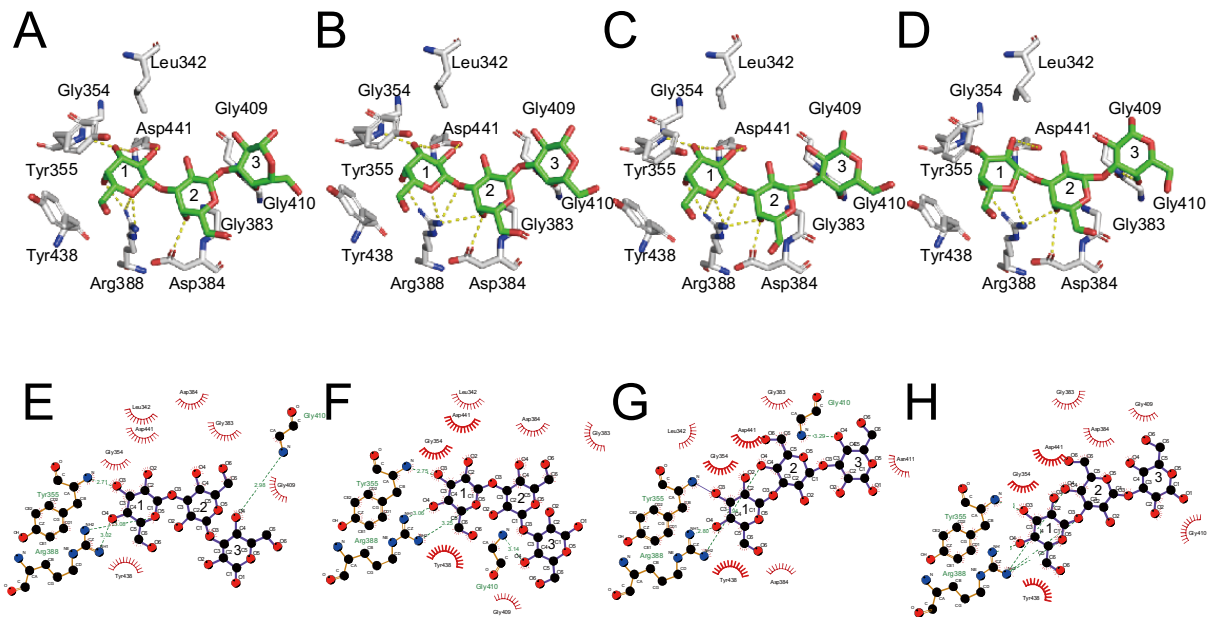

756

757



758 Fig. 5

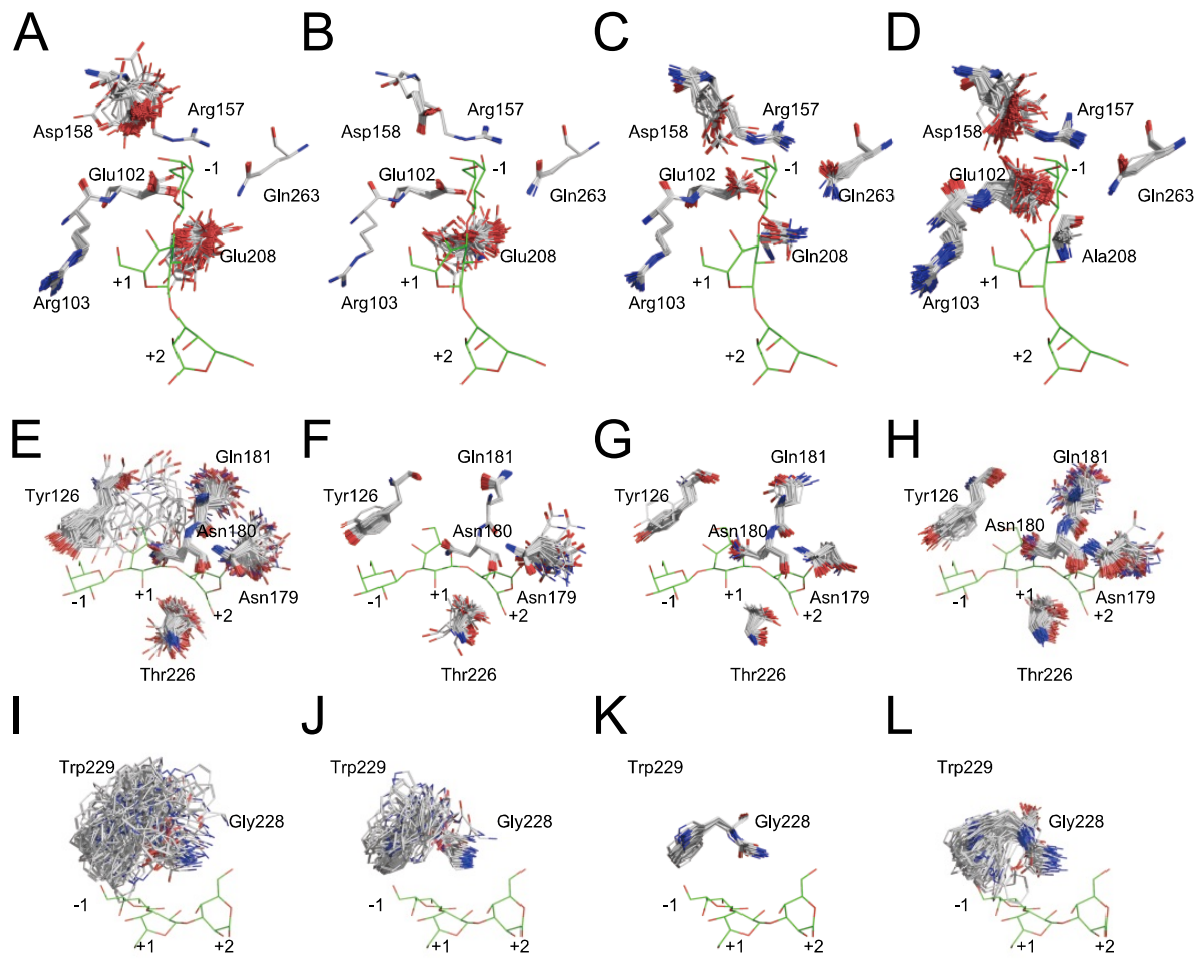

759

760

761 Fig. 6.

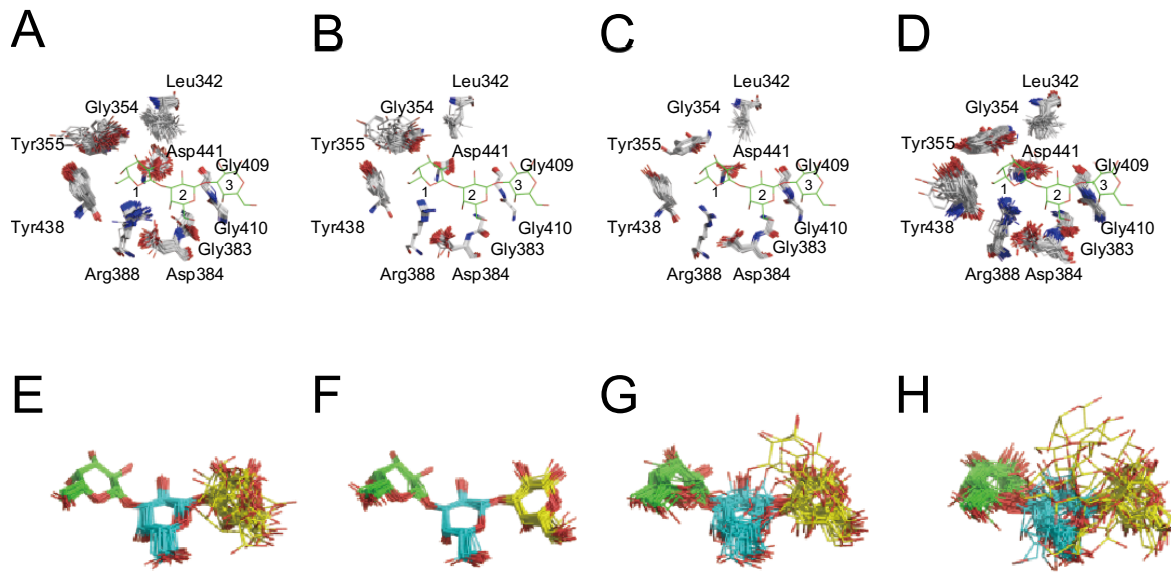

762

763

764 Fig. 7.

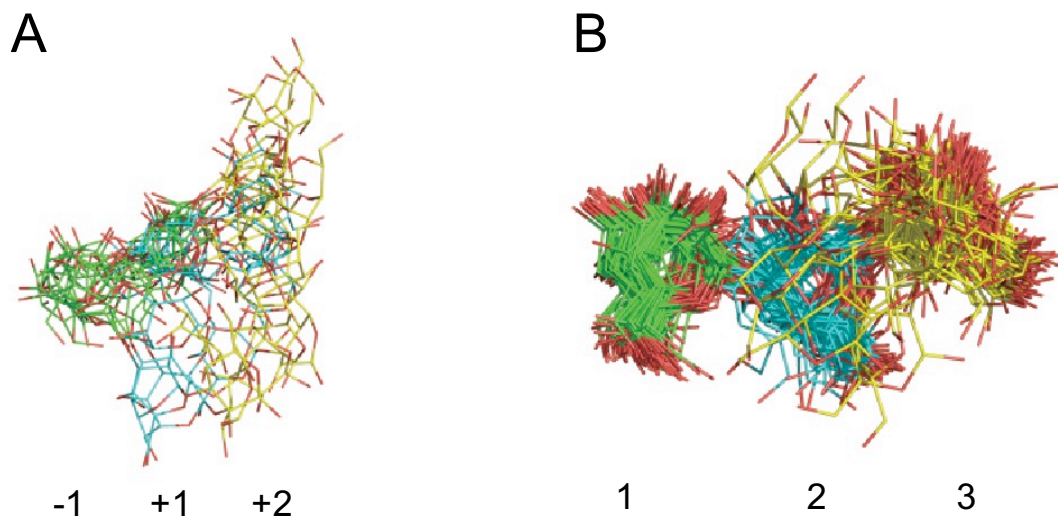

765

766

767 Fig. 8.

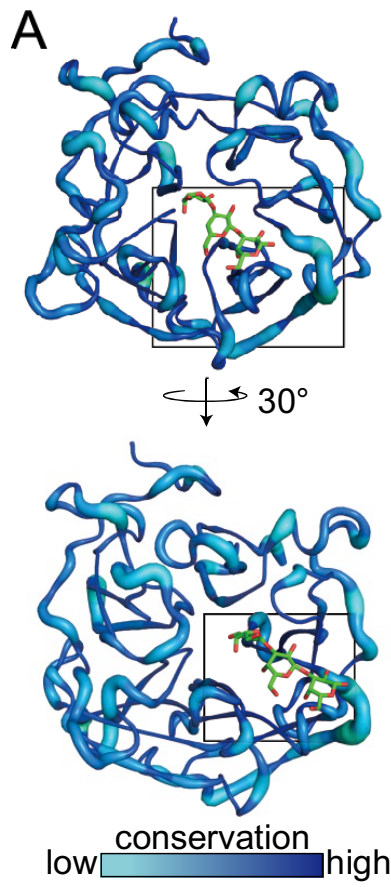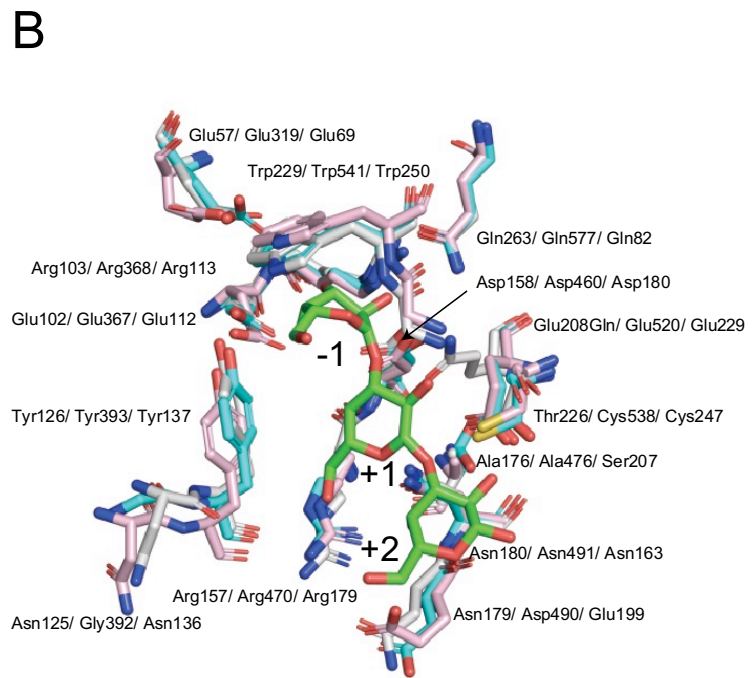

768

769

770

771 Fig. 9.

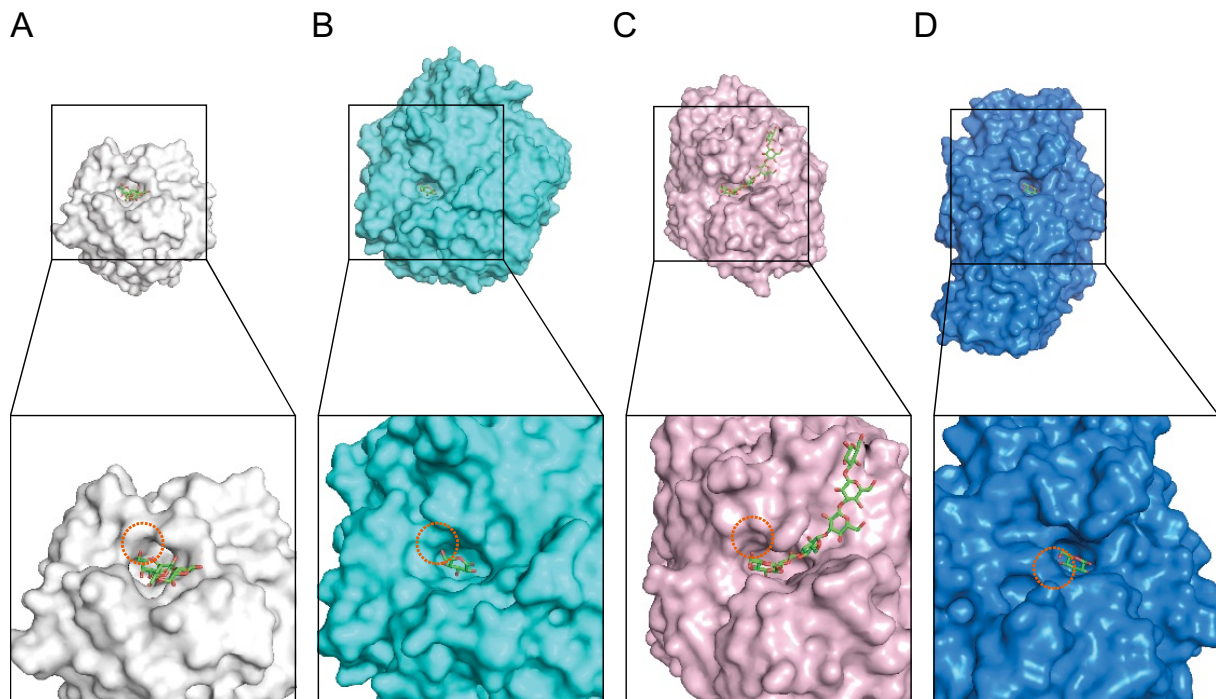

772

773

774 Fig. 10.

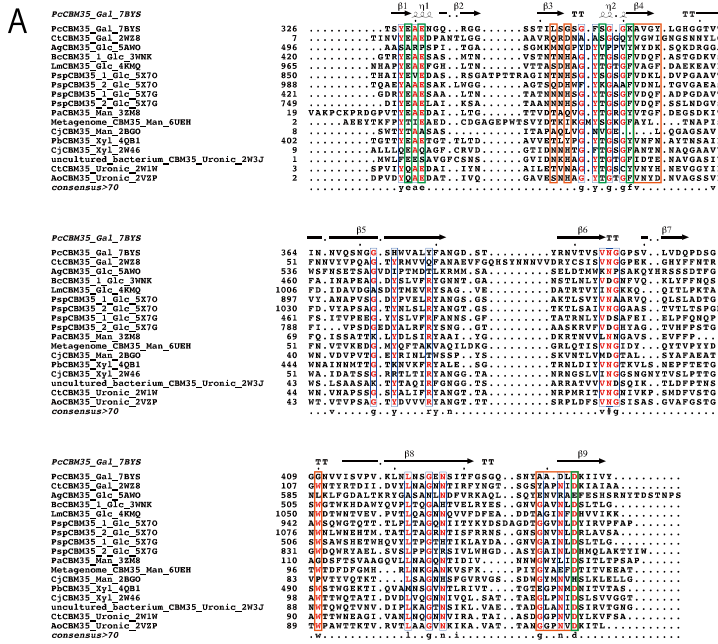

**B**

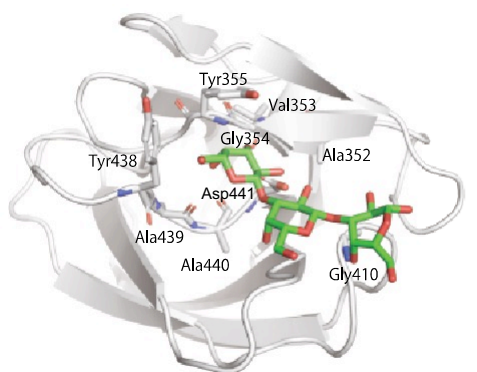

**C**

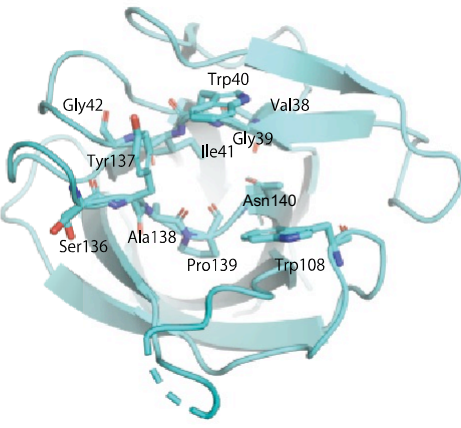

Source: https://www.biorxiv.org/content/10.1101/2020.09.23.310037v1.full.pdf
